# Supplementary material for: Biomarker Discovery for Meta-Classification of Melanoma Metastatic Progression Using Transfer Learning
Source: MDPI journal article supplement (doi:10.3390/genes13122303), 2022-12-07
Supplement: s1 [file s1]

# Biomarker Discovery for Meta-Classification and Prognosis of Melanoma using Transfer Learning

## 1 Supplementary Materials

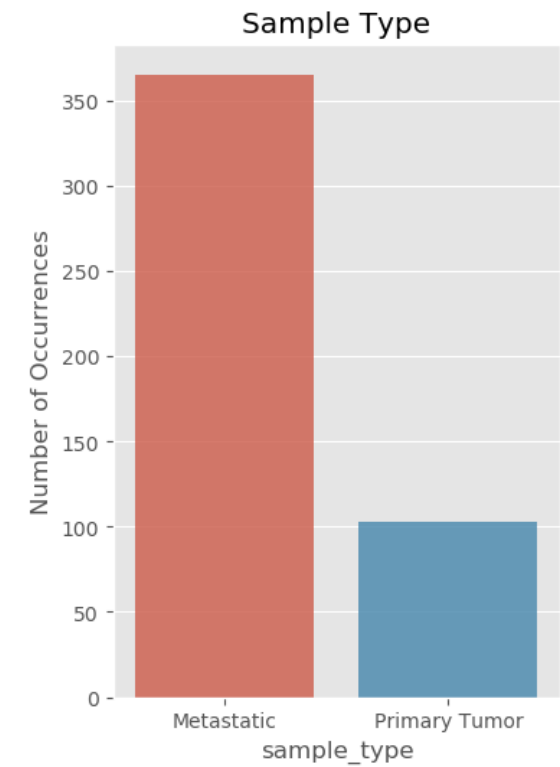

**Figure S 1.** Distribution of Sample Type

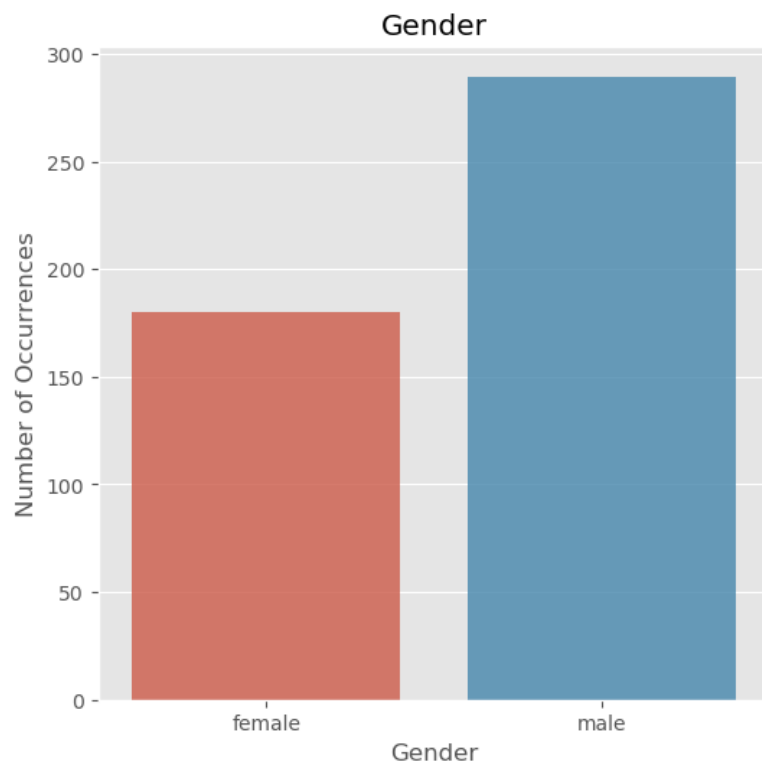

**Figure S 2.** Distribution of Gender

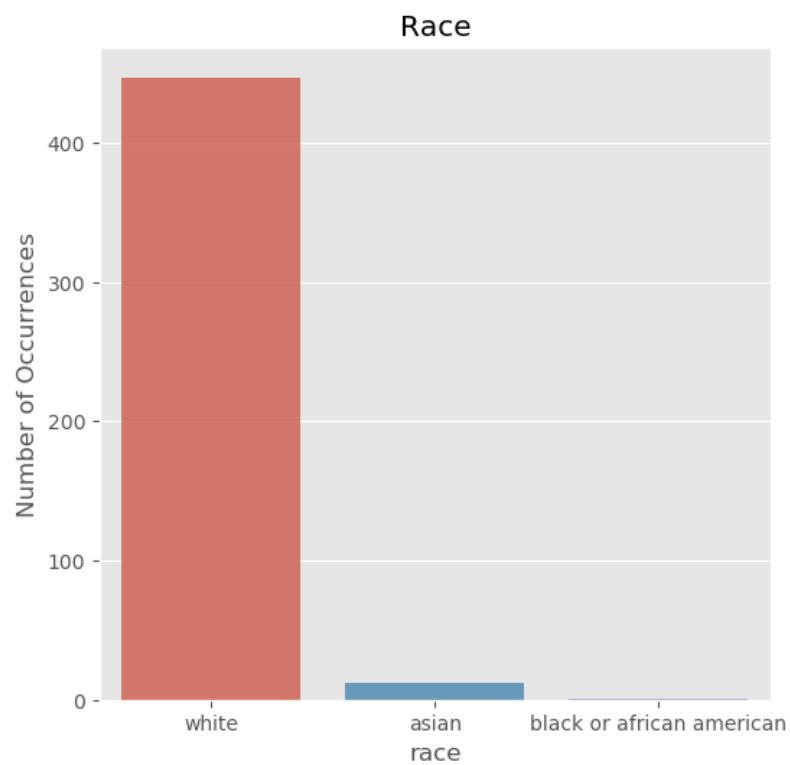

**Figure S 3.** Distribution of Race

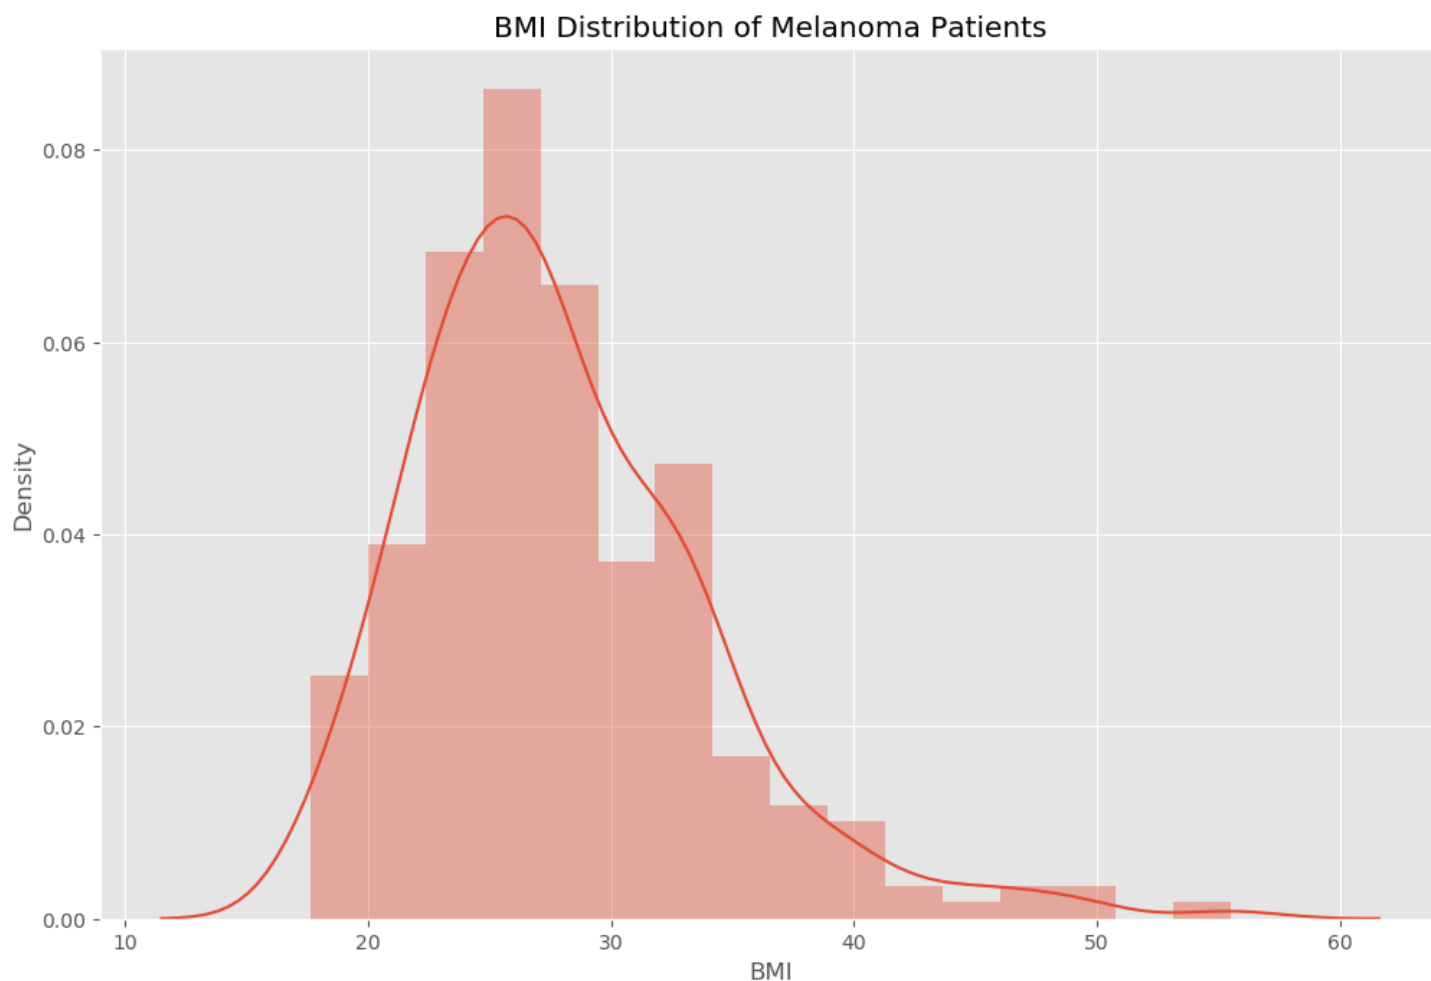

**Figure S 4.** Distribution of BMI

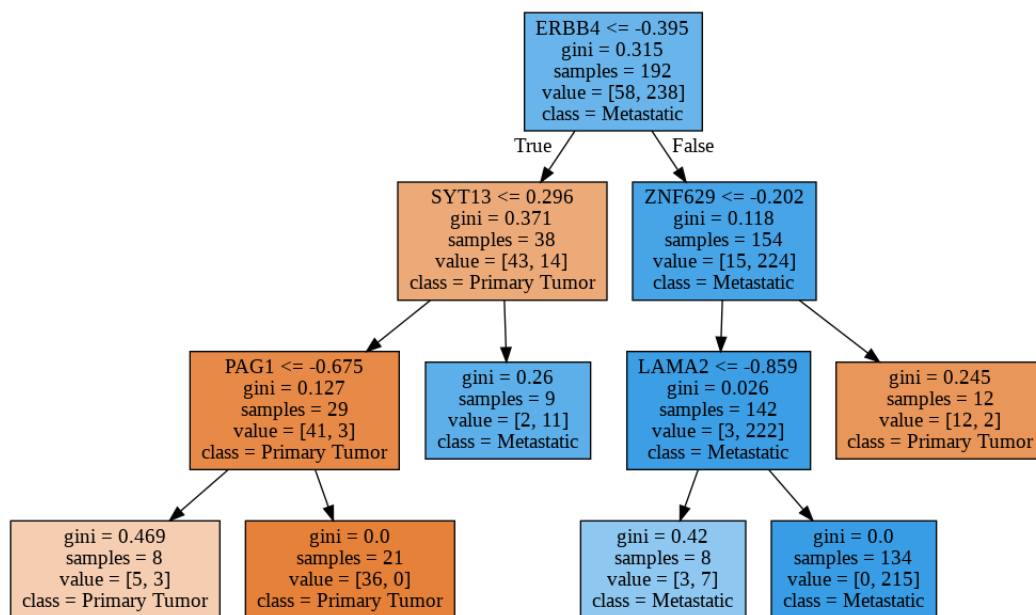

**Figure S 5.** Biomarker Discovery - Random Forest Estimator 1

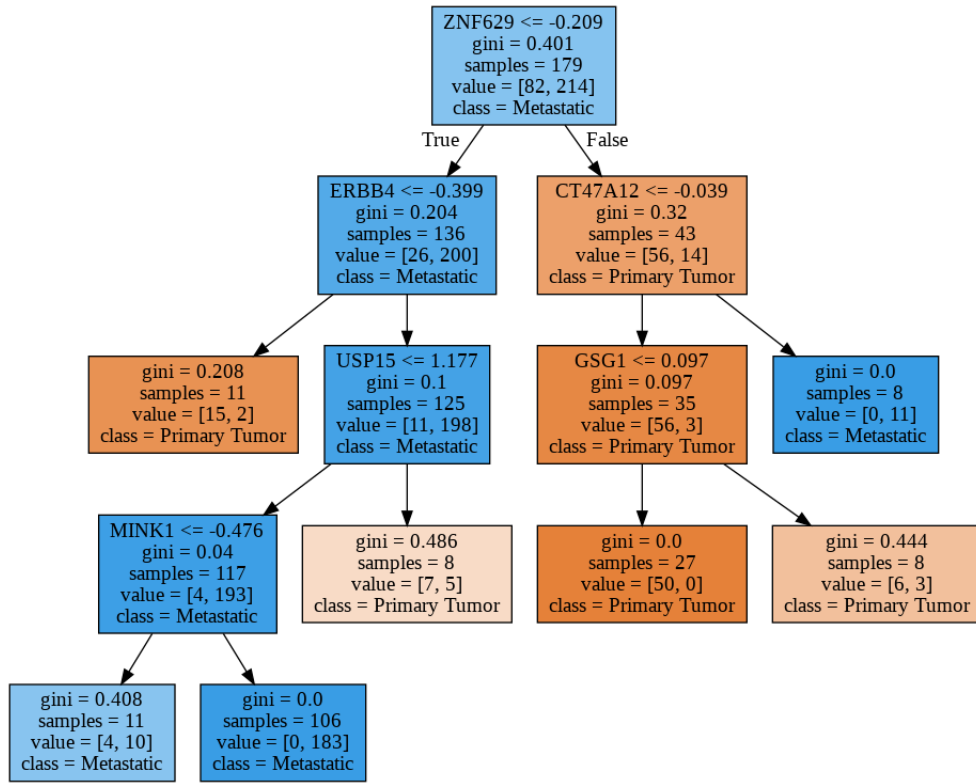

Figure S 6. Biomarker Discovery - Random Forest Estimator 2

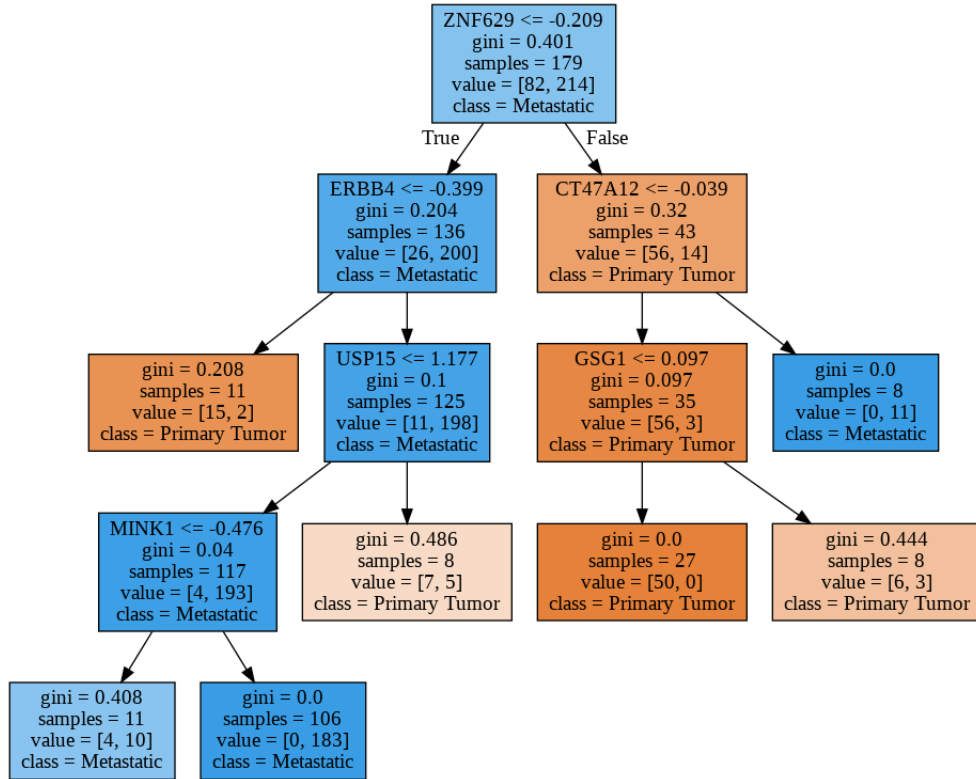

Figure S 7. Biomarker Discovery - Random Forest Estimator 3

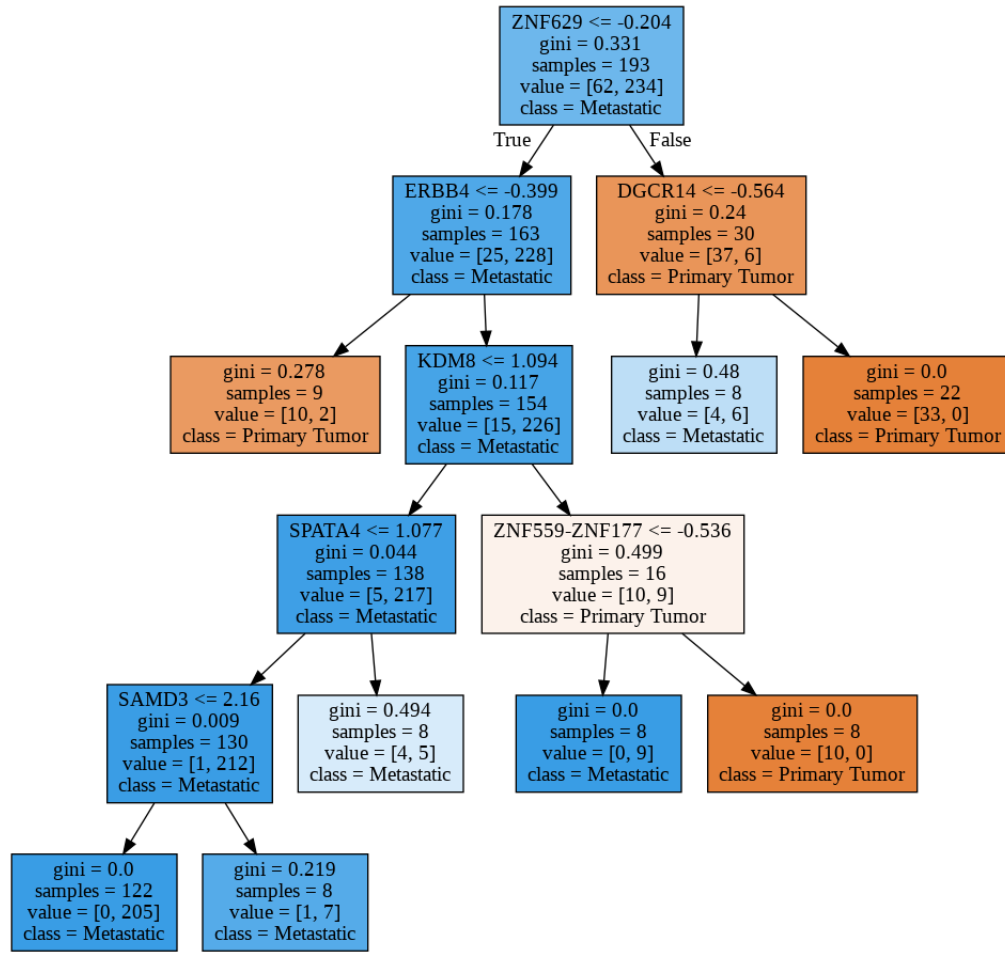

Figure S 8. Biomarker Discovery - Random Forest Estimator 4

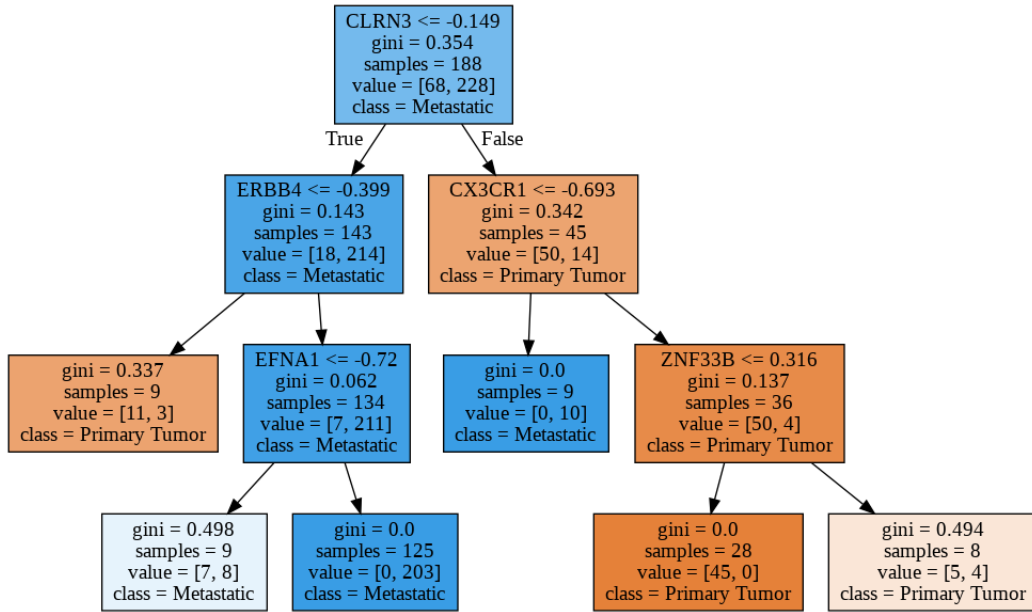

Figure S 9. Biomarker Discovery - Random Forest Estimator 5

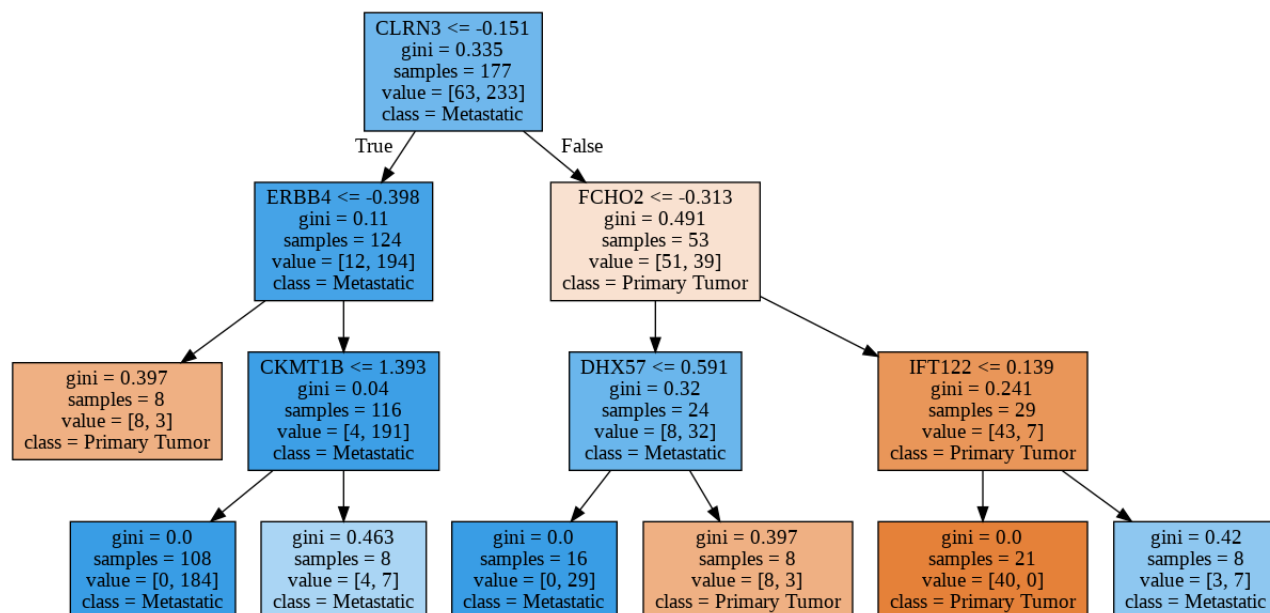

Figure S 10. Biomarker Discovery - Random Forest Estimator 6

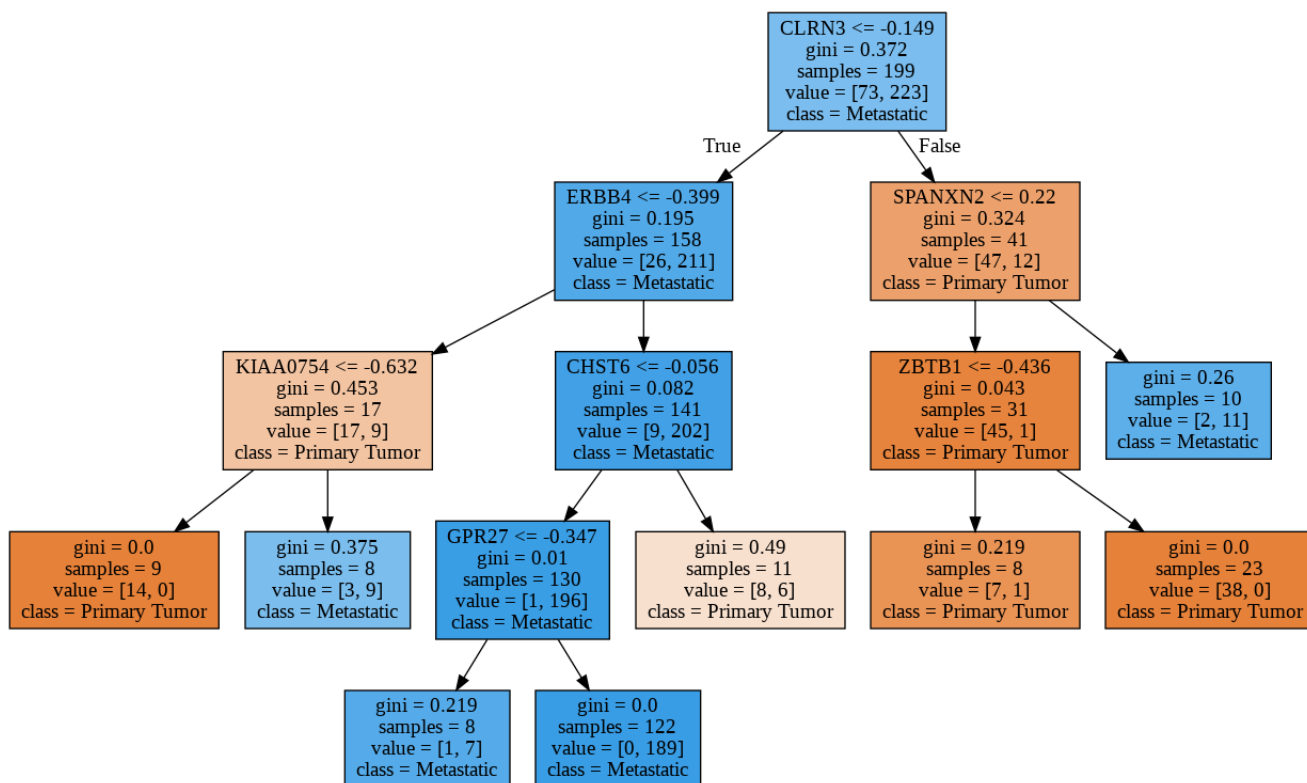

Figure S 11. Biomarker Discovery - Random Forest Estimator 7

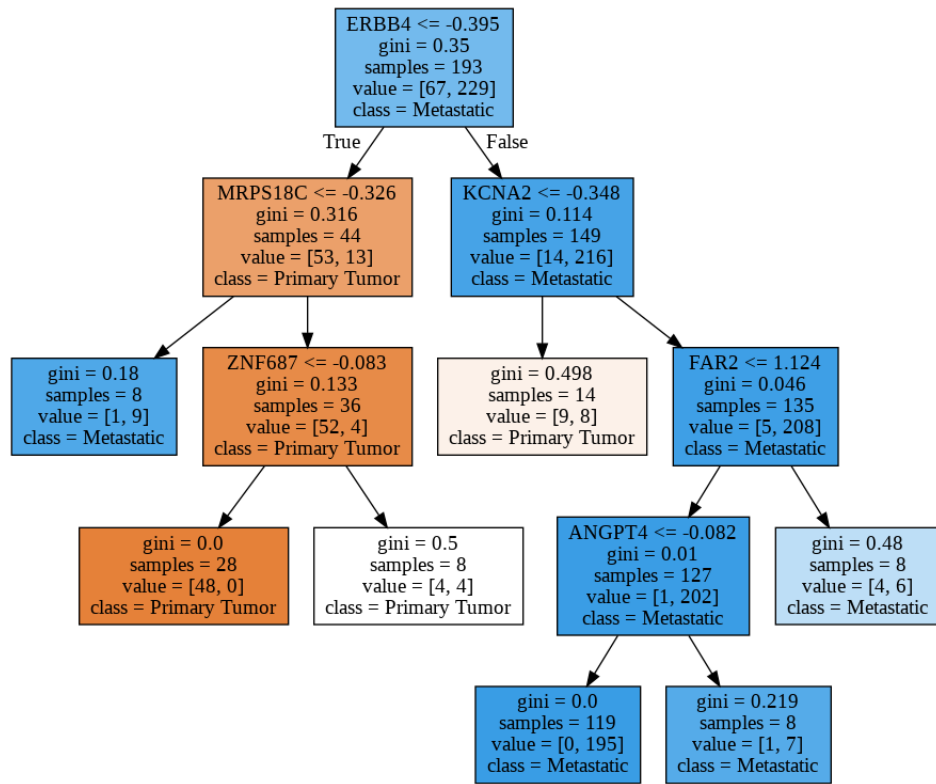

Figure S 12. Biomarker Discovery - Random Forest Estimator 8

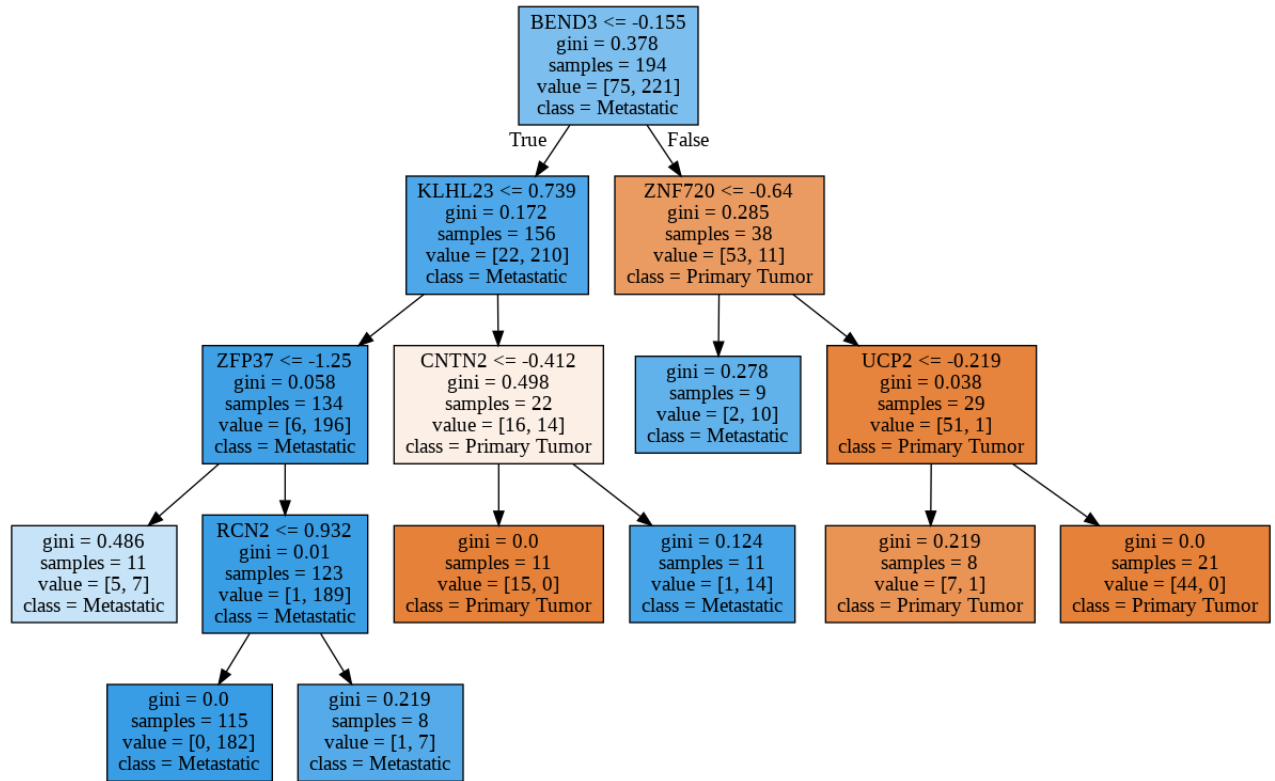

Figure S 13. Biomarker Discovery - Random Forest Estimator 9

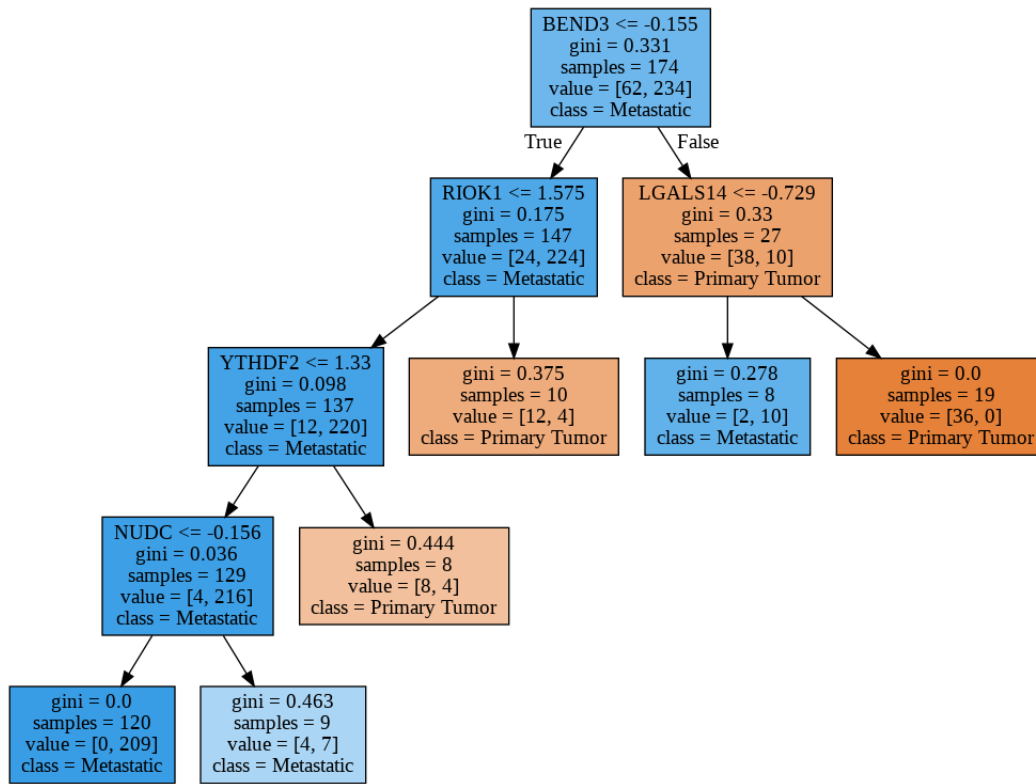

Figure S 14. Biomarker Discovery - Random Forest Estimator 10

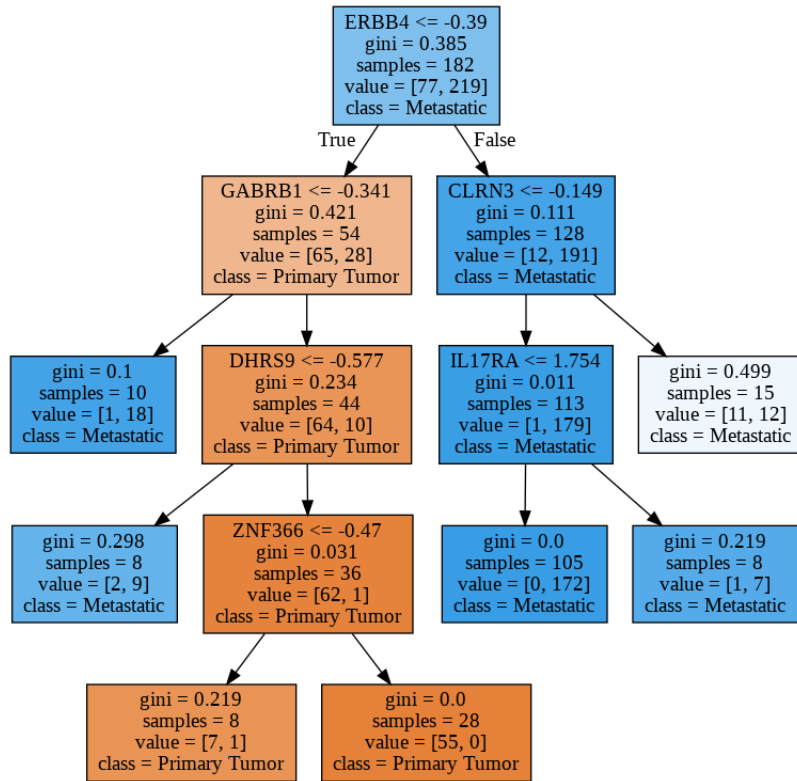

Figure S 15. Biomarker Discovery - Random Forest Estimator 11



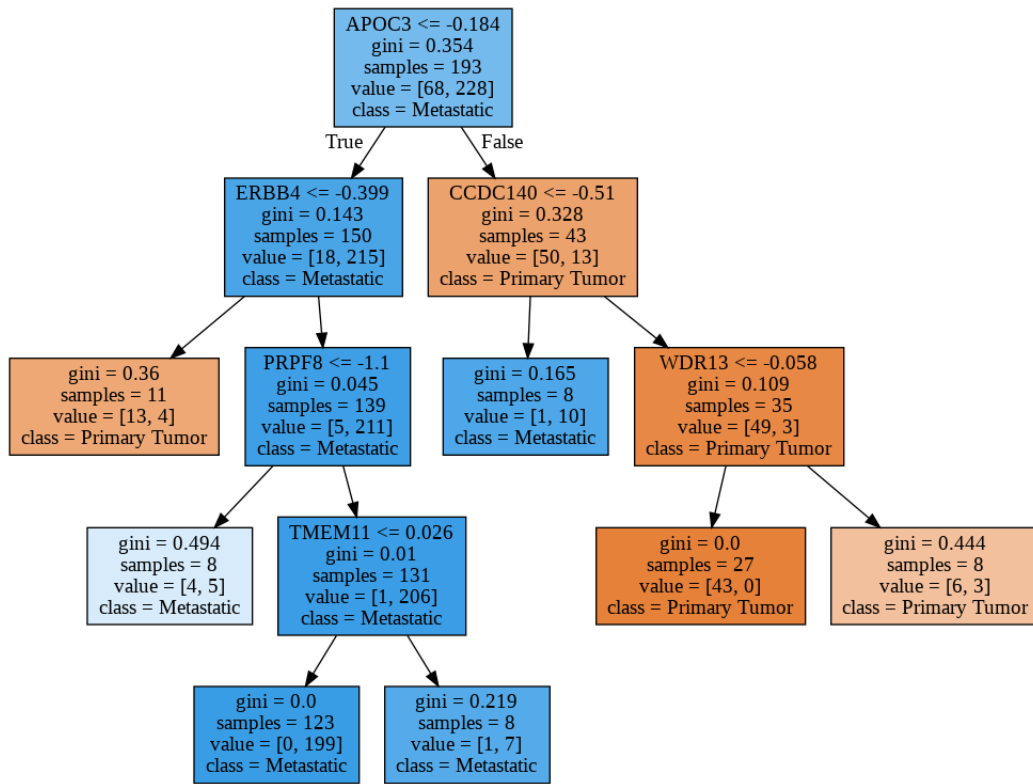

Figure S 16. Biomarker Discovery - Random Forest Estimator 12

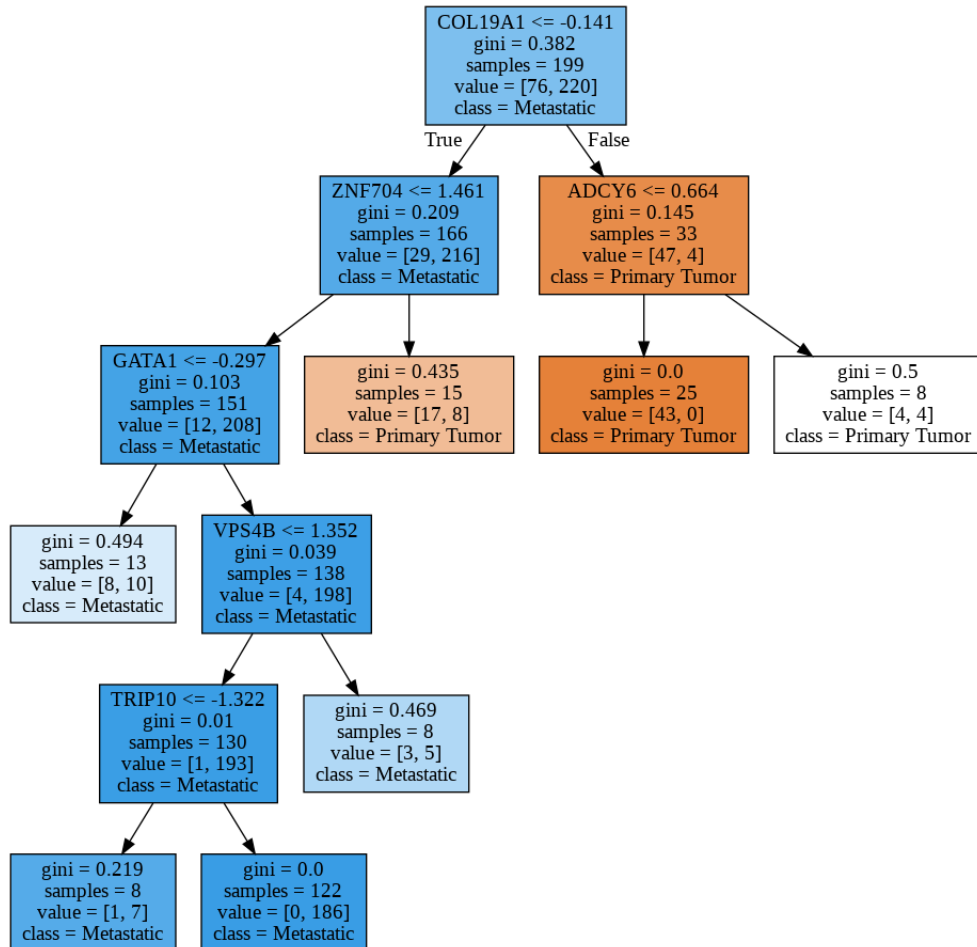

Figure S 17. Biomarker Discovery - Random Forest Estimator 13

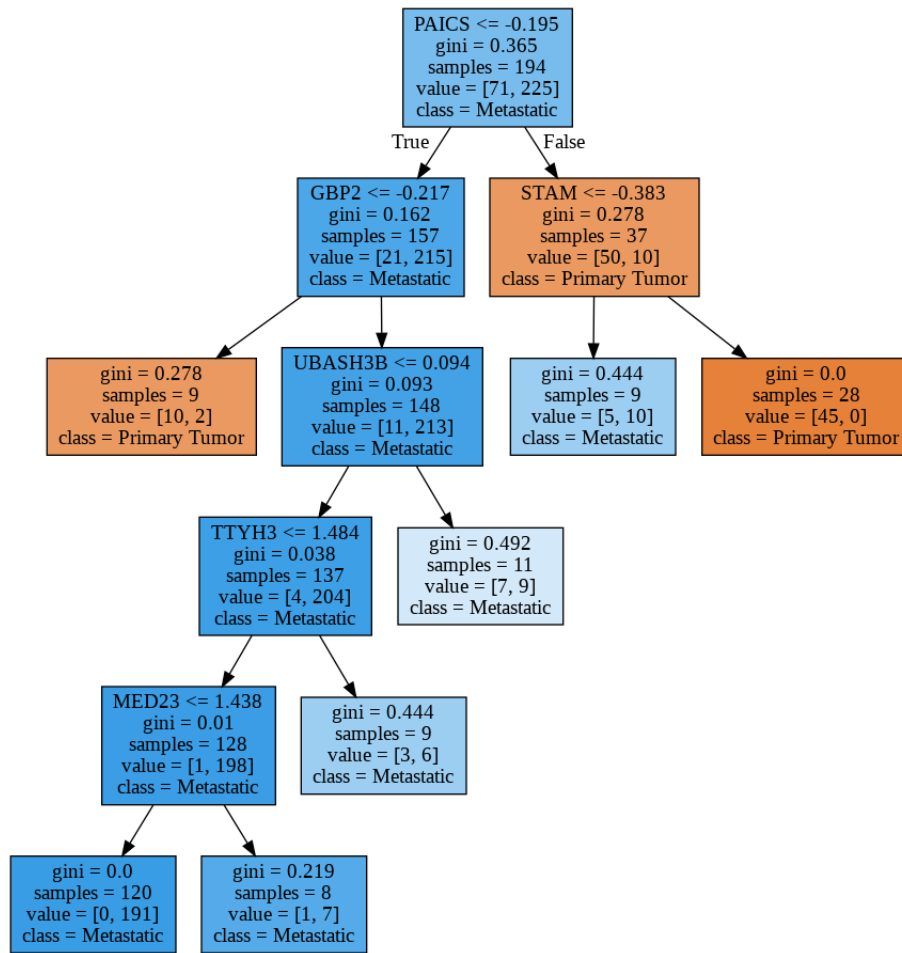

**Figure S 18.** Biomarker Discovery - Random Forest Estimator 14

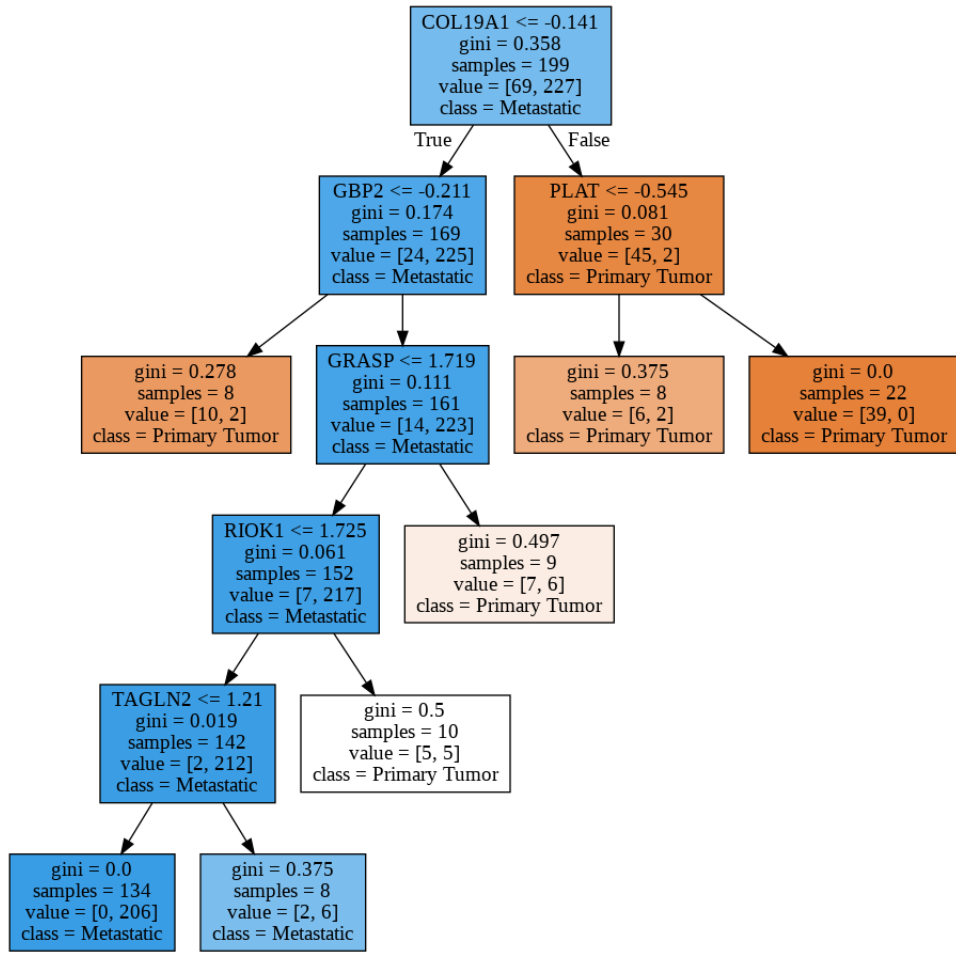

Figure S 19. Biomarker Discovery - Random Forest Estimator 15

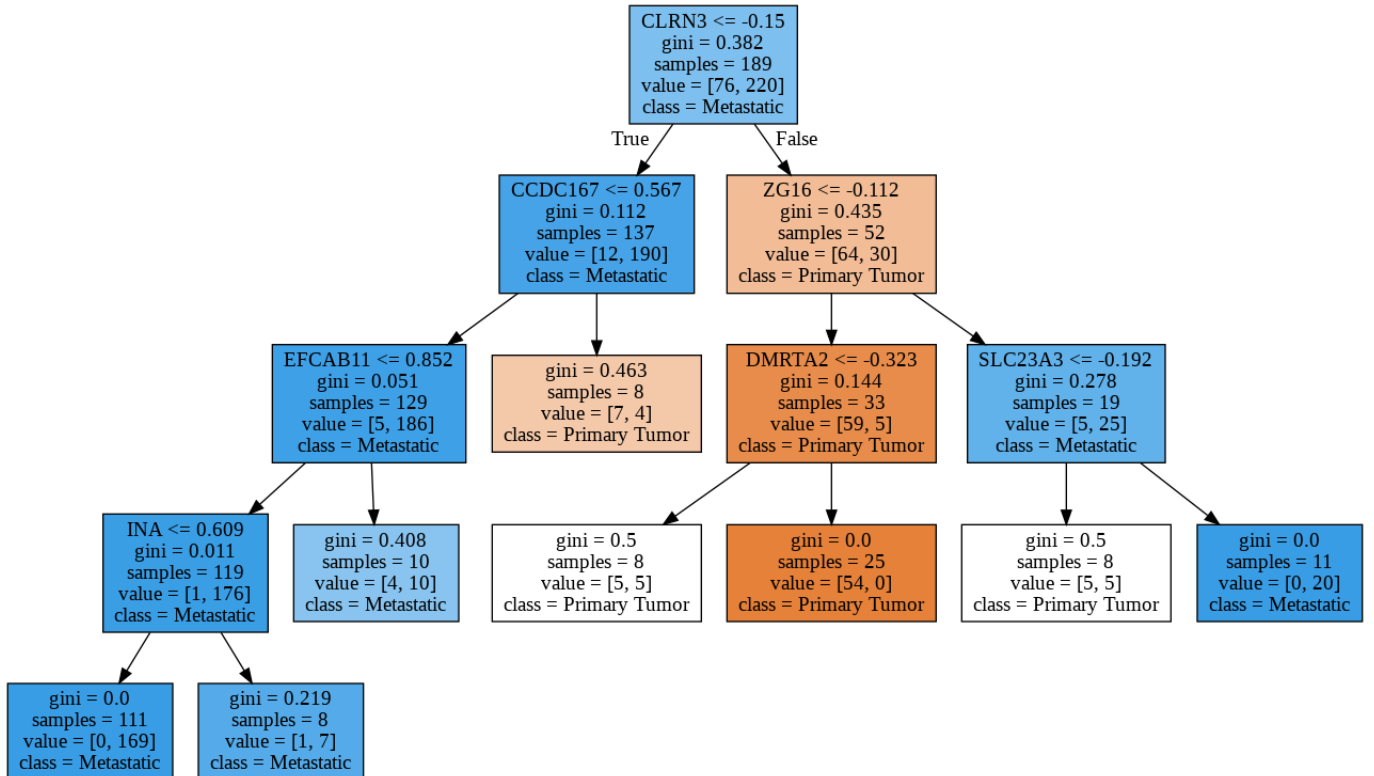

Figure S 20. Biomarker Discovery - Random Forest Estimator 16

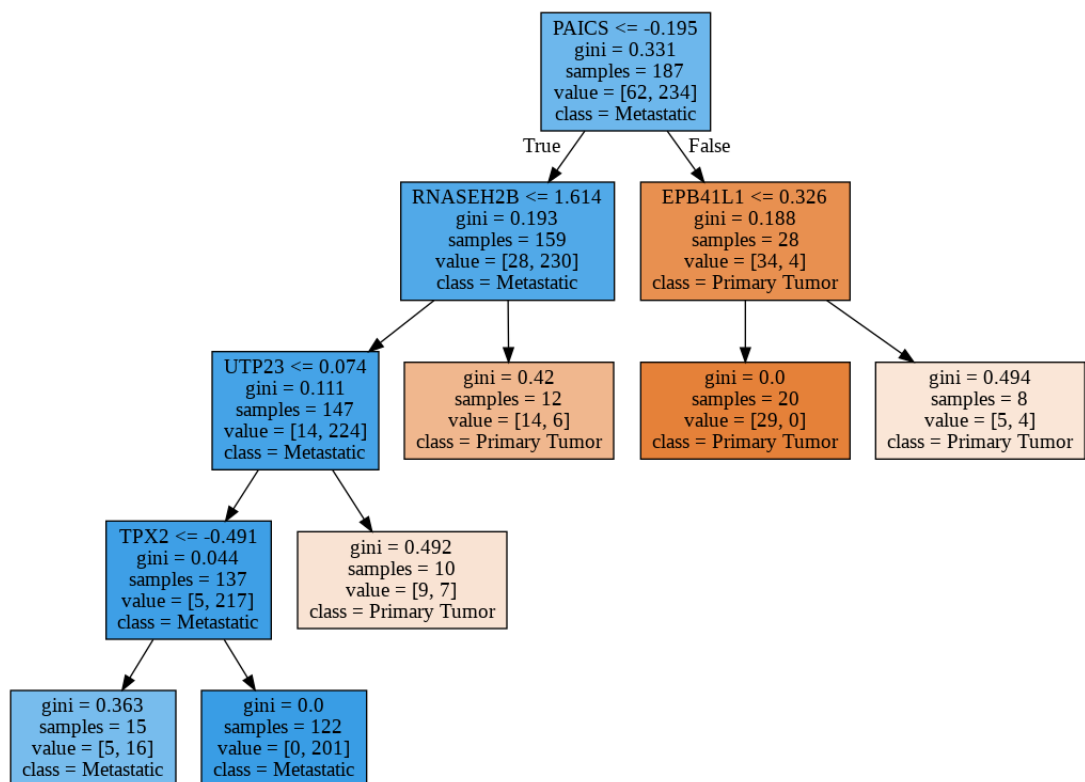

Figure S 21. Biomarker Discovery - Random Forest Estimator 17

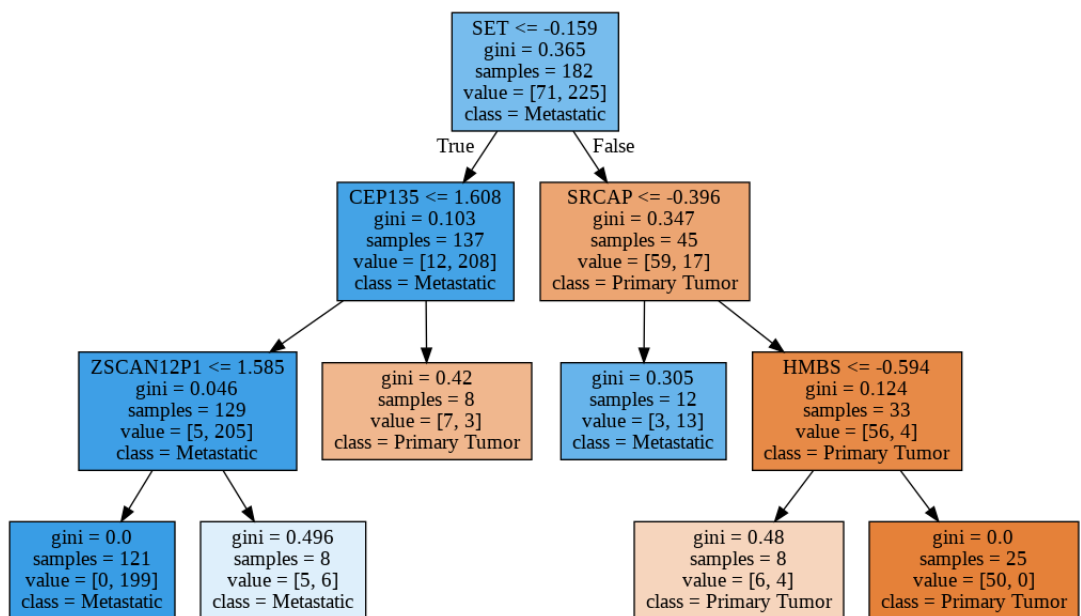

Figure S 22. Biomarker Discovery - Random Forest Estimator 18

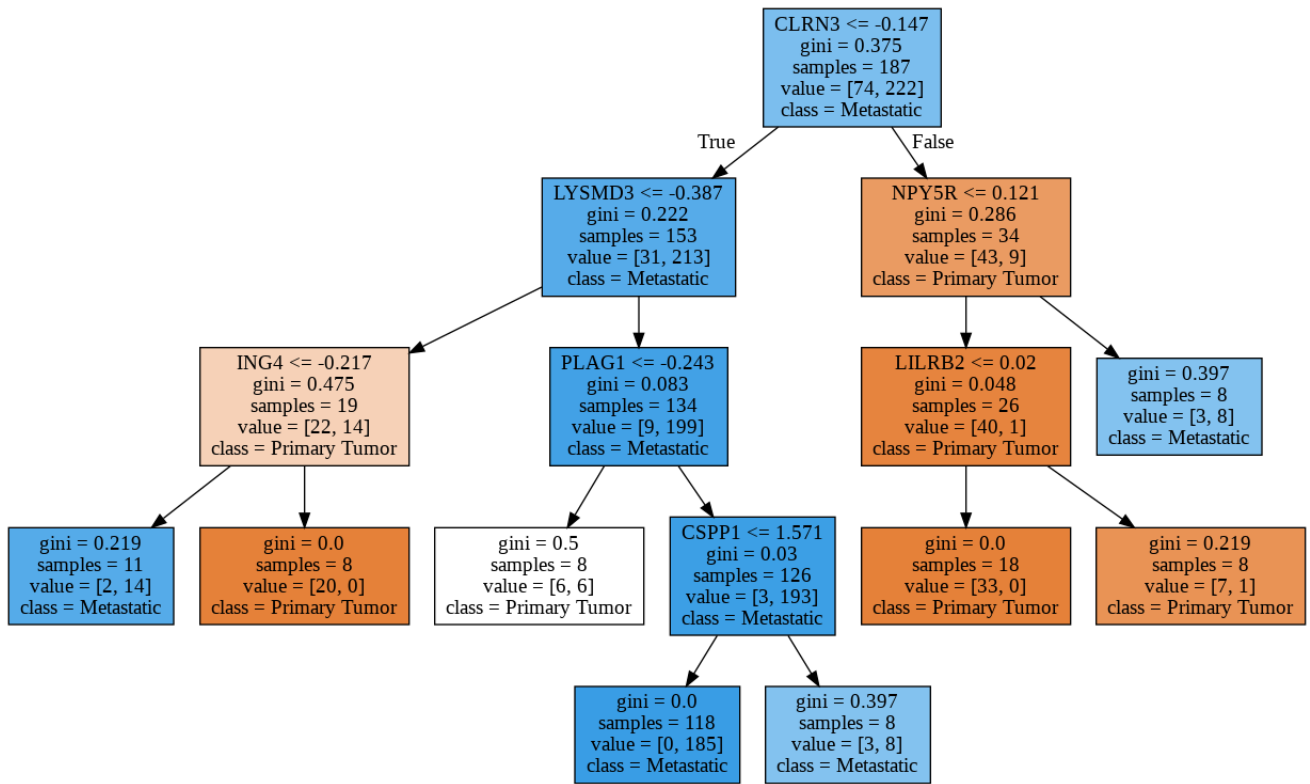

Figure S 23. Biomarker Discovery - Random Forest Estimator 19

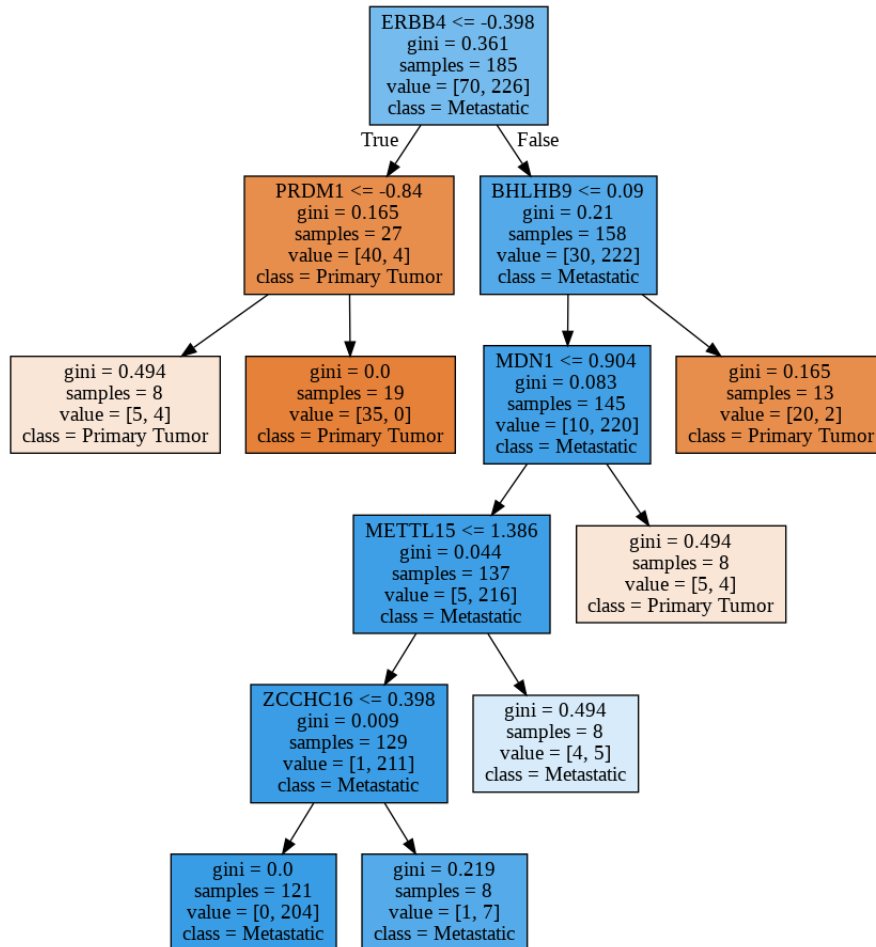

Figure S 24. Biomarker Discovery - Random Forest Estimator 20

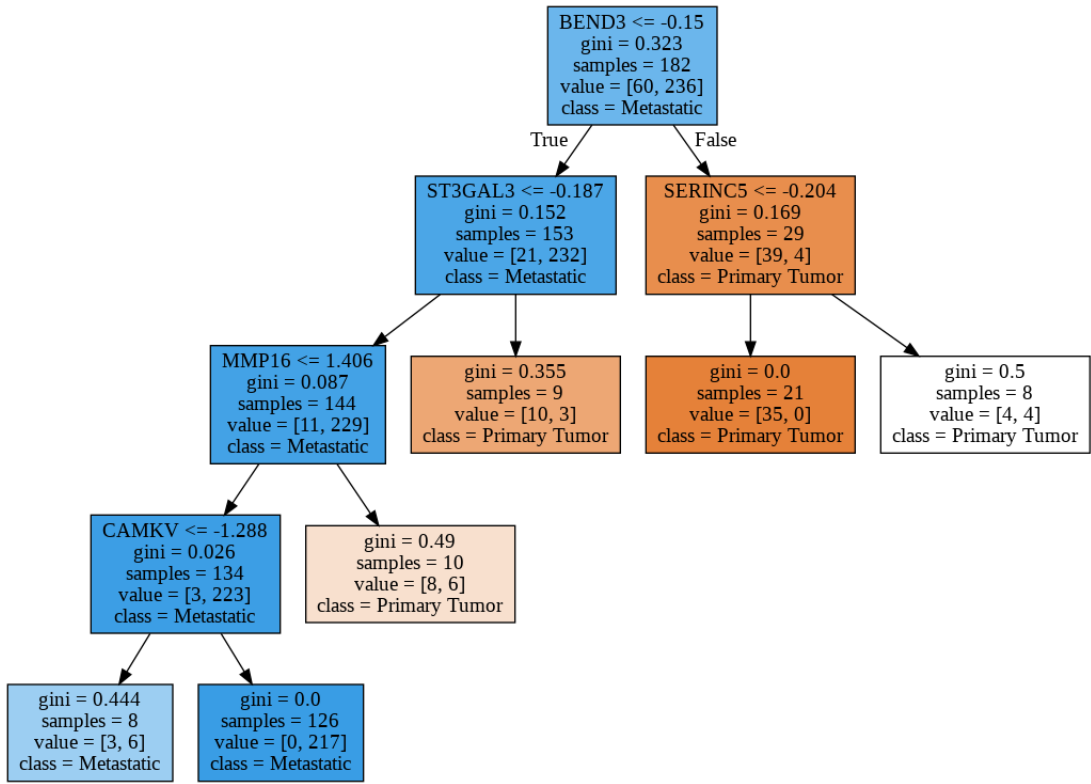

Figure S 25. Biomarker Discovery - Random Forest Estimator 21

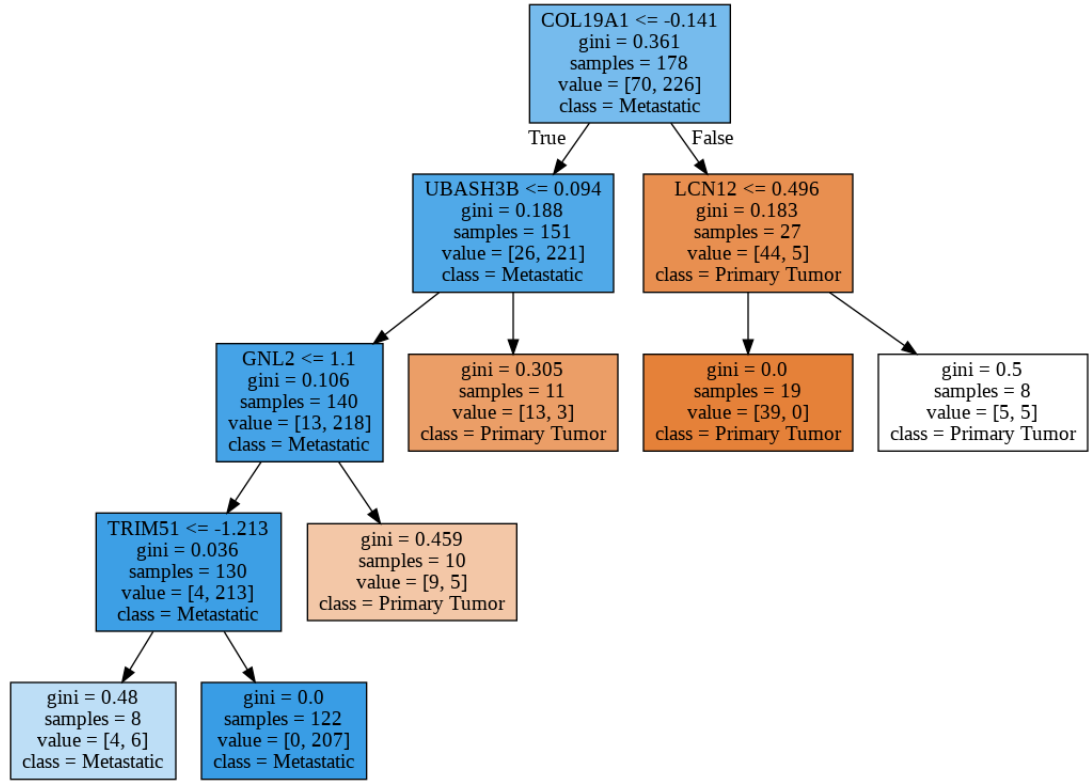

Figure S 26. Biomarker Discovery - Random Forest Estimator 22

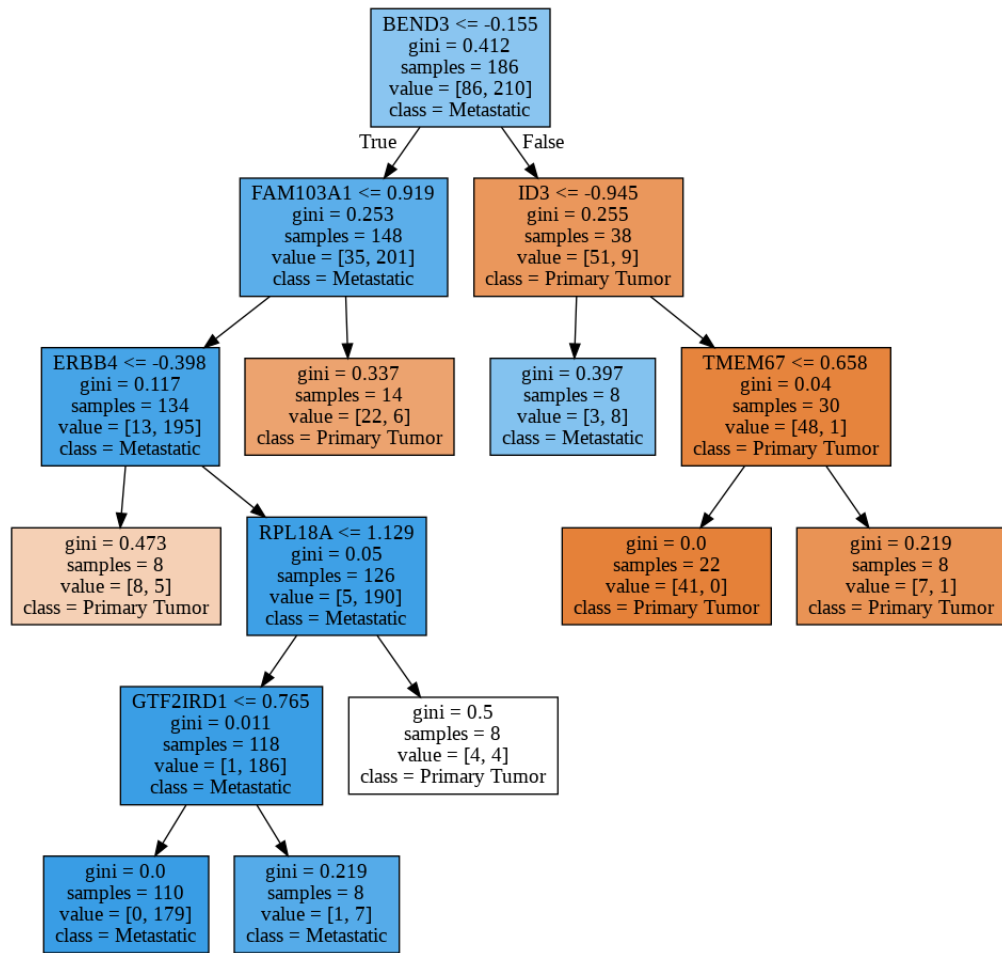

**Figure S 27.** Biomarker Discovery - Random Forest Estimator 23

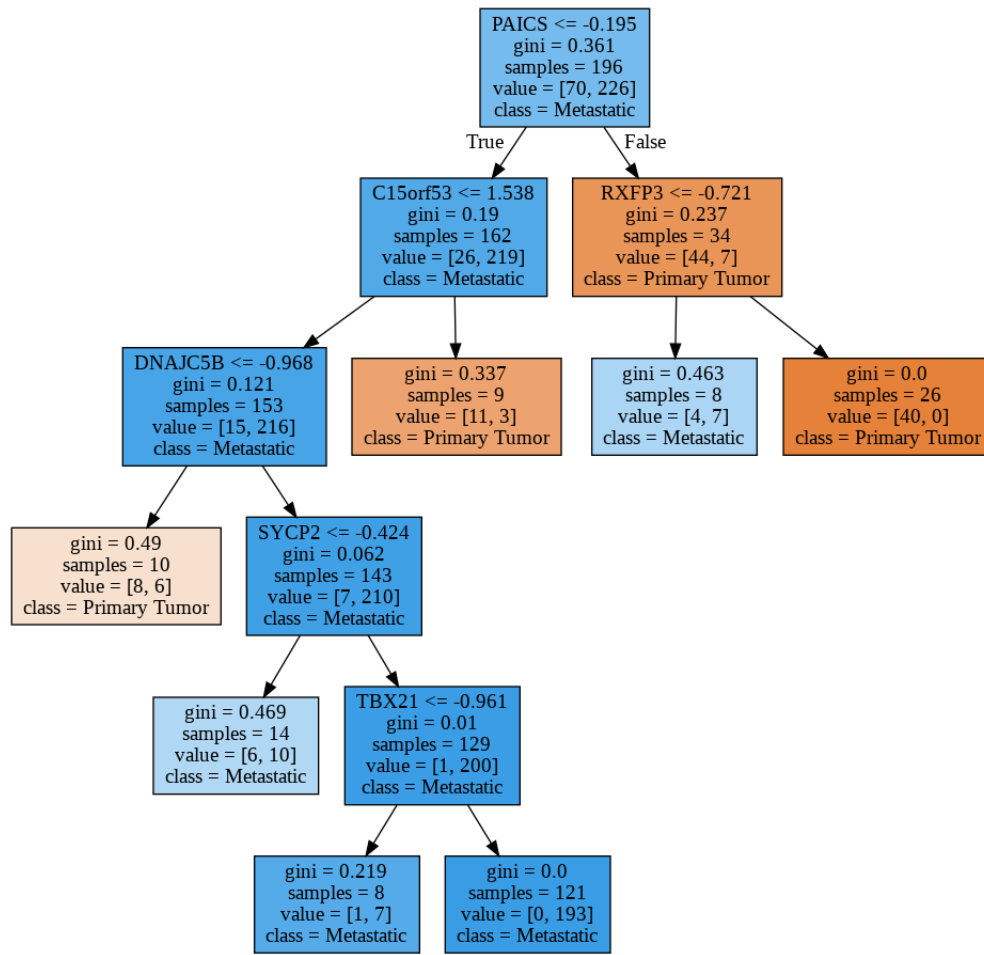

Figure S 28. Biomarker Discovery - Random Forest Estimator 24

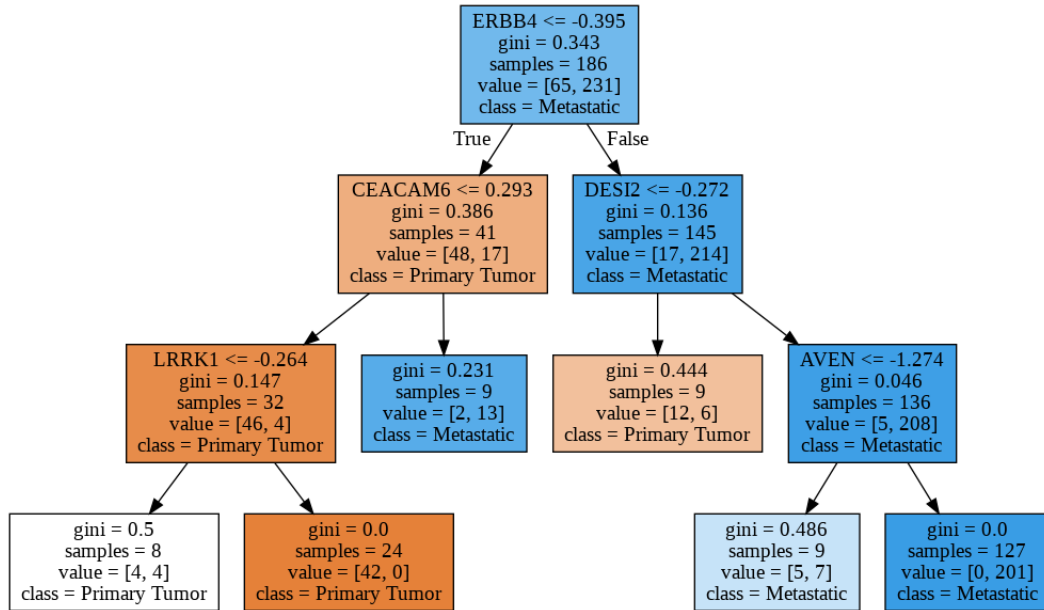

Figure S 29. Biomarker Discovery - Random Forest Estimator 25



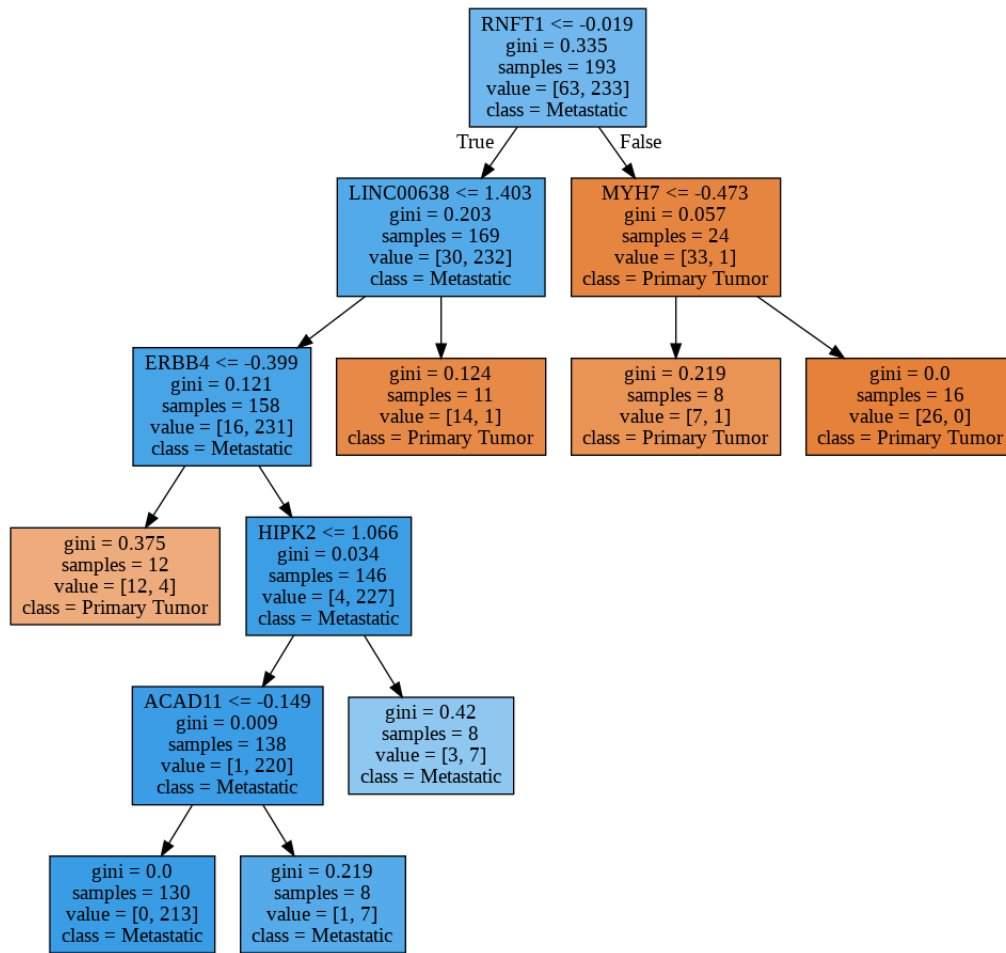

Figure S 30. Biomarker Discovery - Random Forest Estimator 26

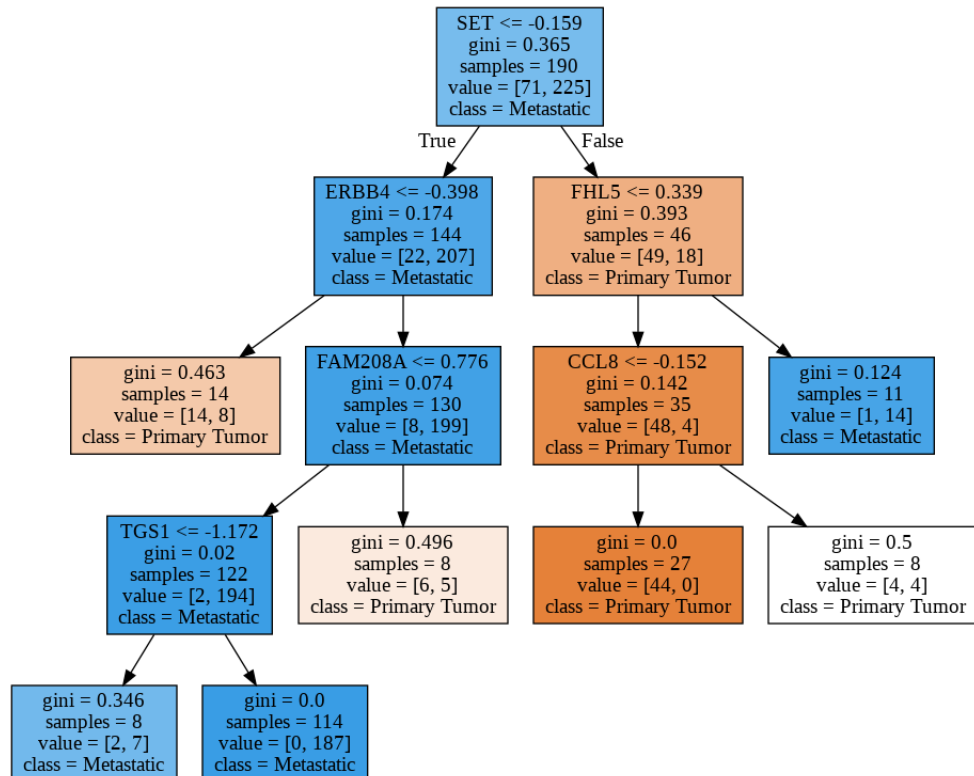

Figure S 31. Biomarker Discovery - Random Forest Estimator 27

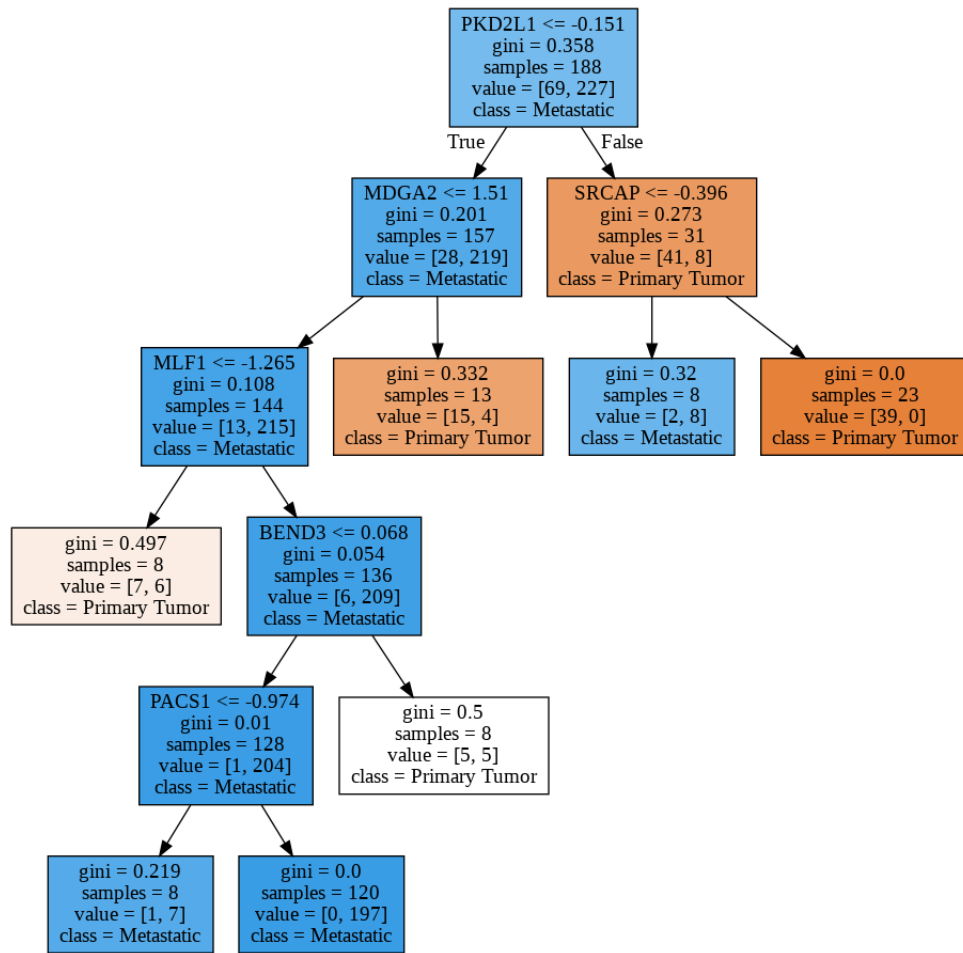

Figure S 32. Biomarker Discovery - Random Forest Estimator 28

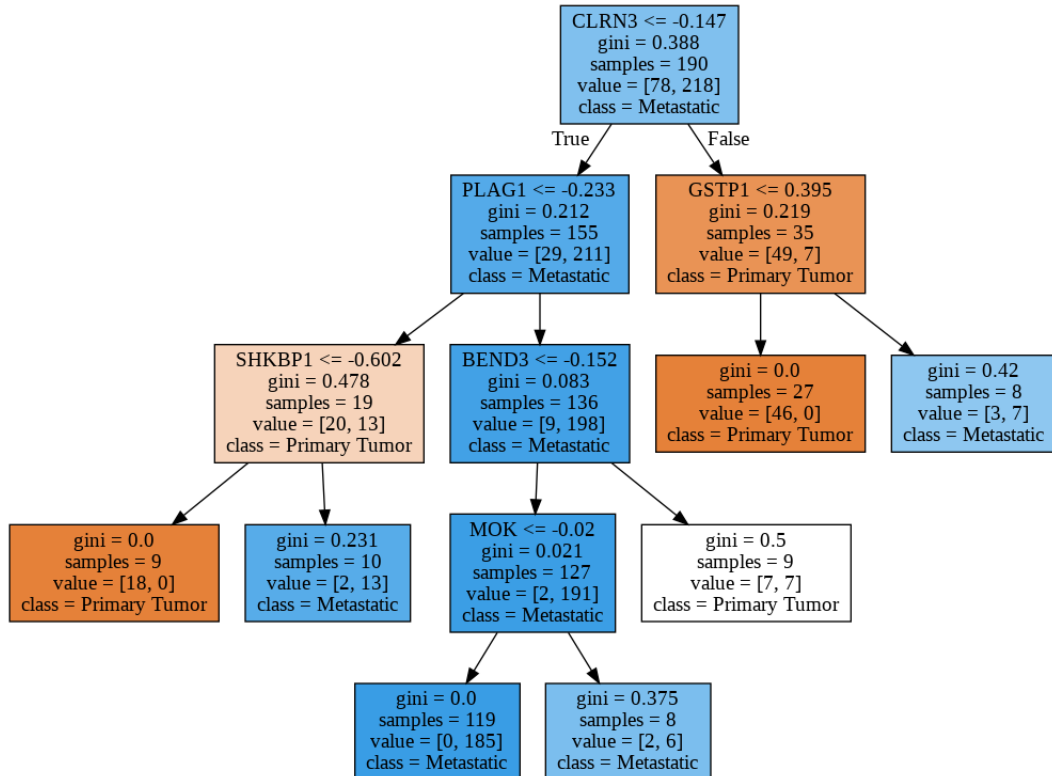

Figure S 33. Biomarker Discovery - Random Forest Estimator 29

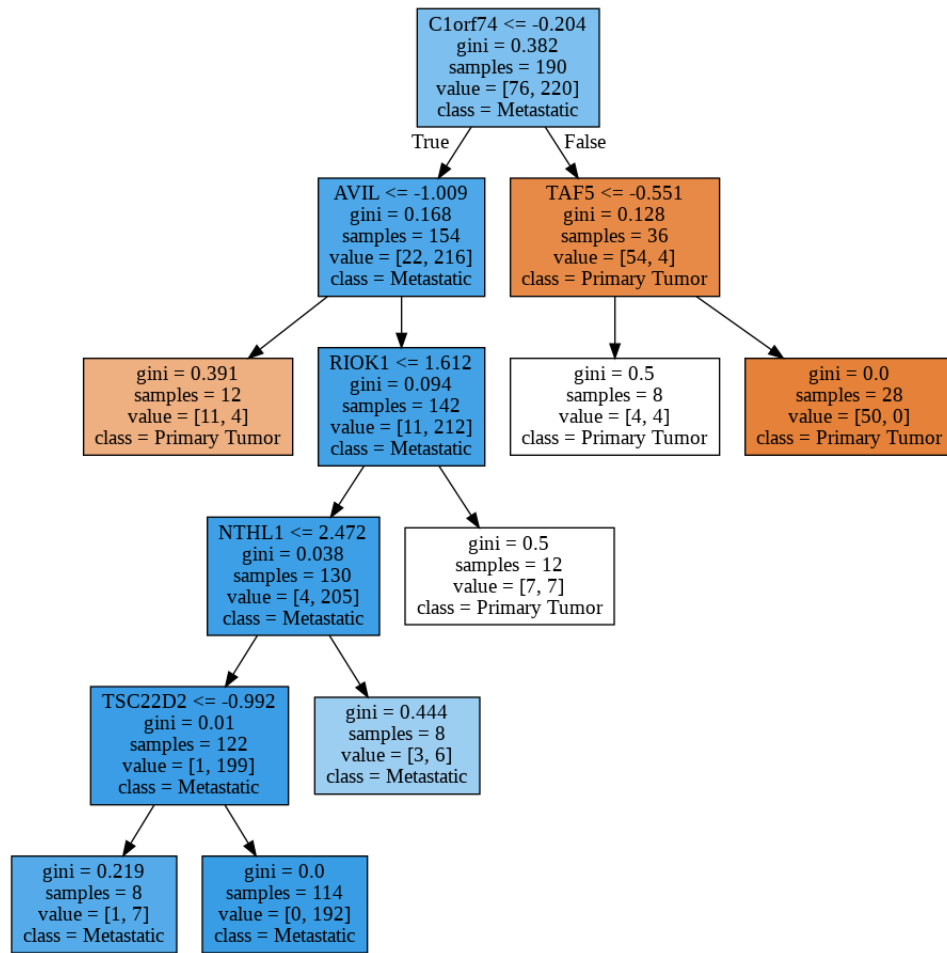

**Figure S 34.** Biomarker Discovery - Random Forest Estimator 30

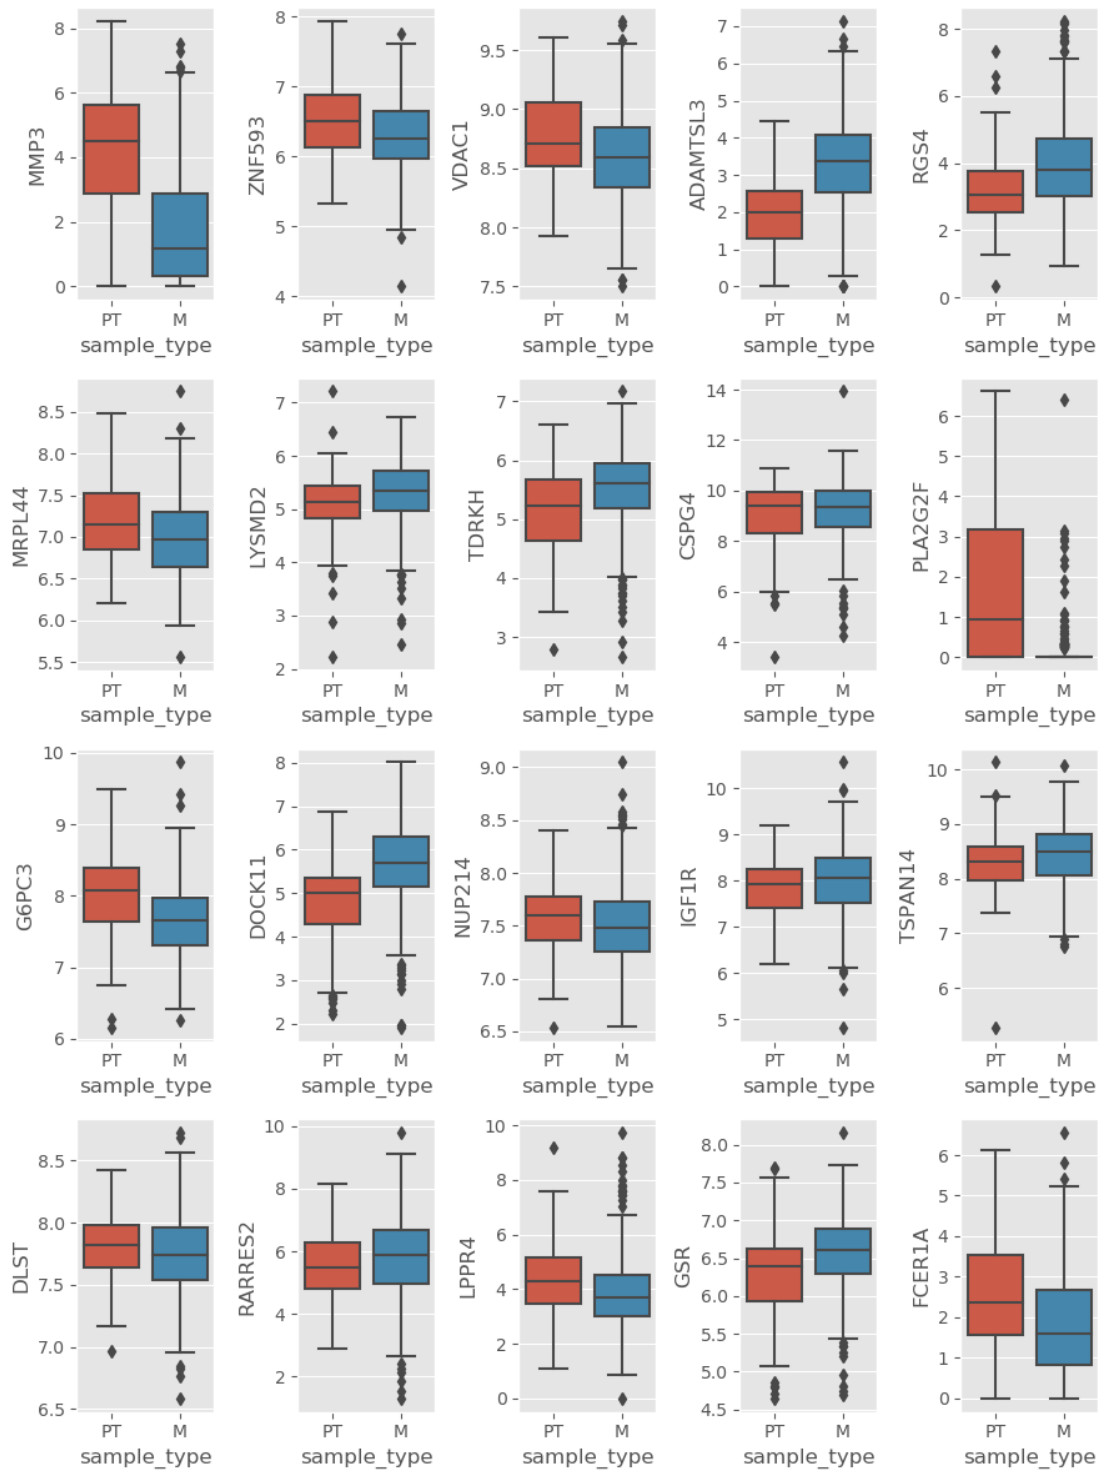

**Figure S 35.** Box Plots of Top 21 - 40 Gene Expressions.

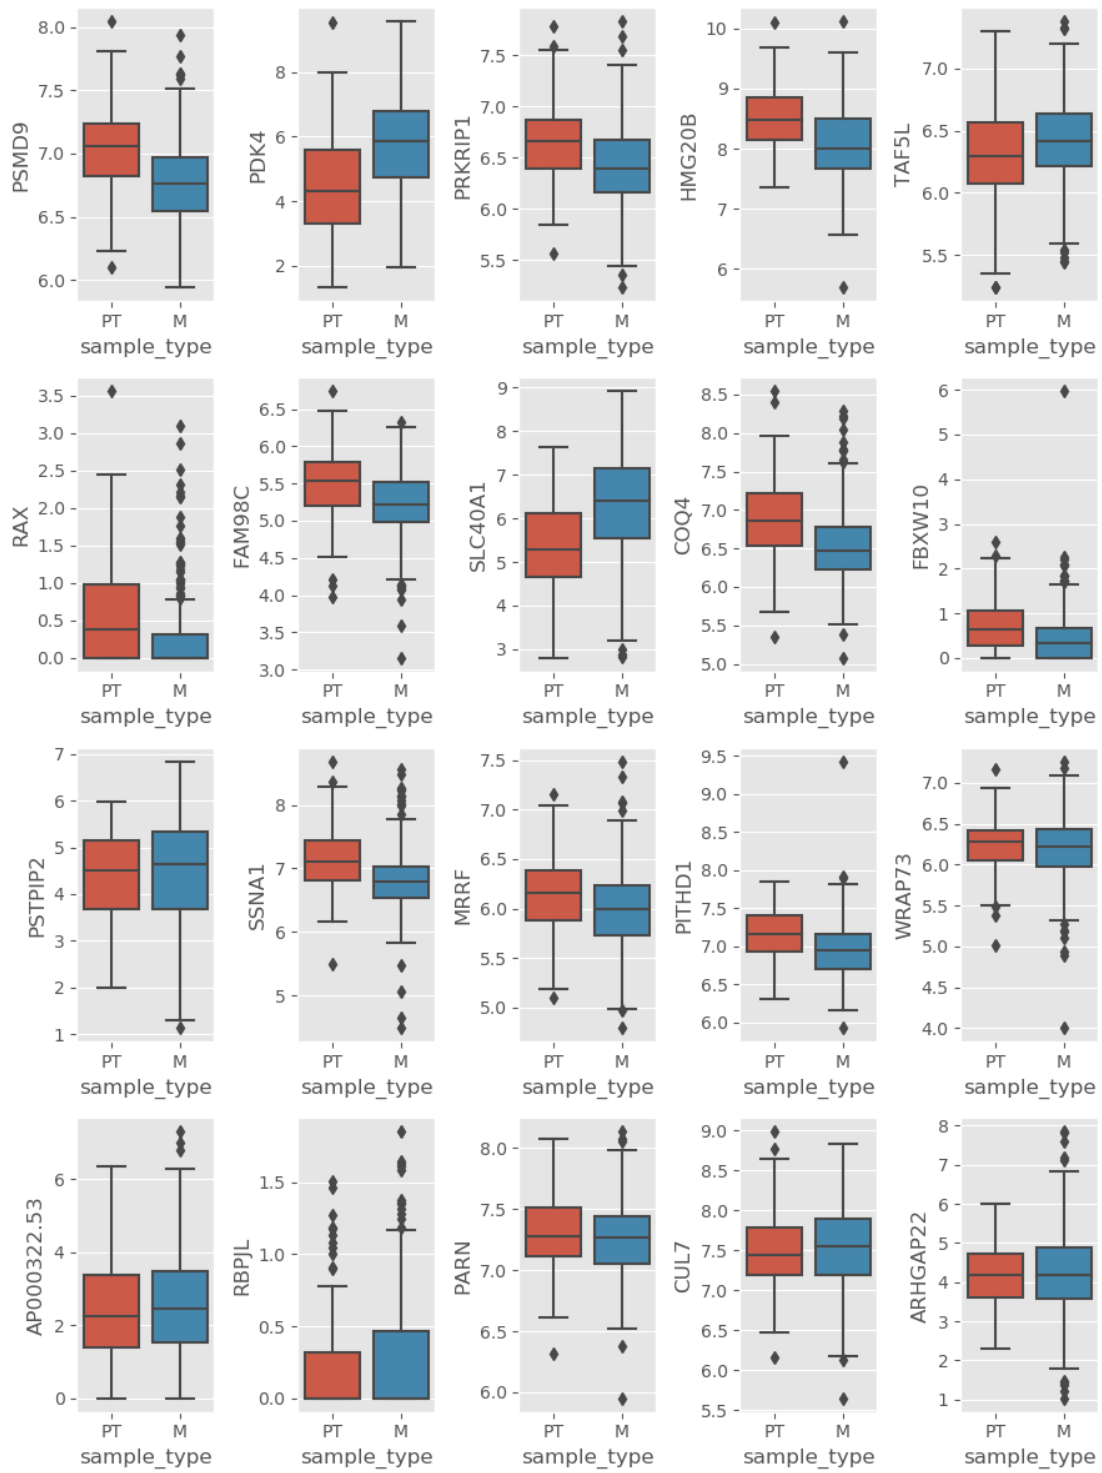

**Figure S 36.** Box Plots of Top 41 - 60 Gene Expressions.

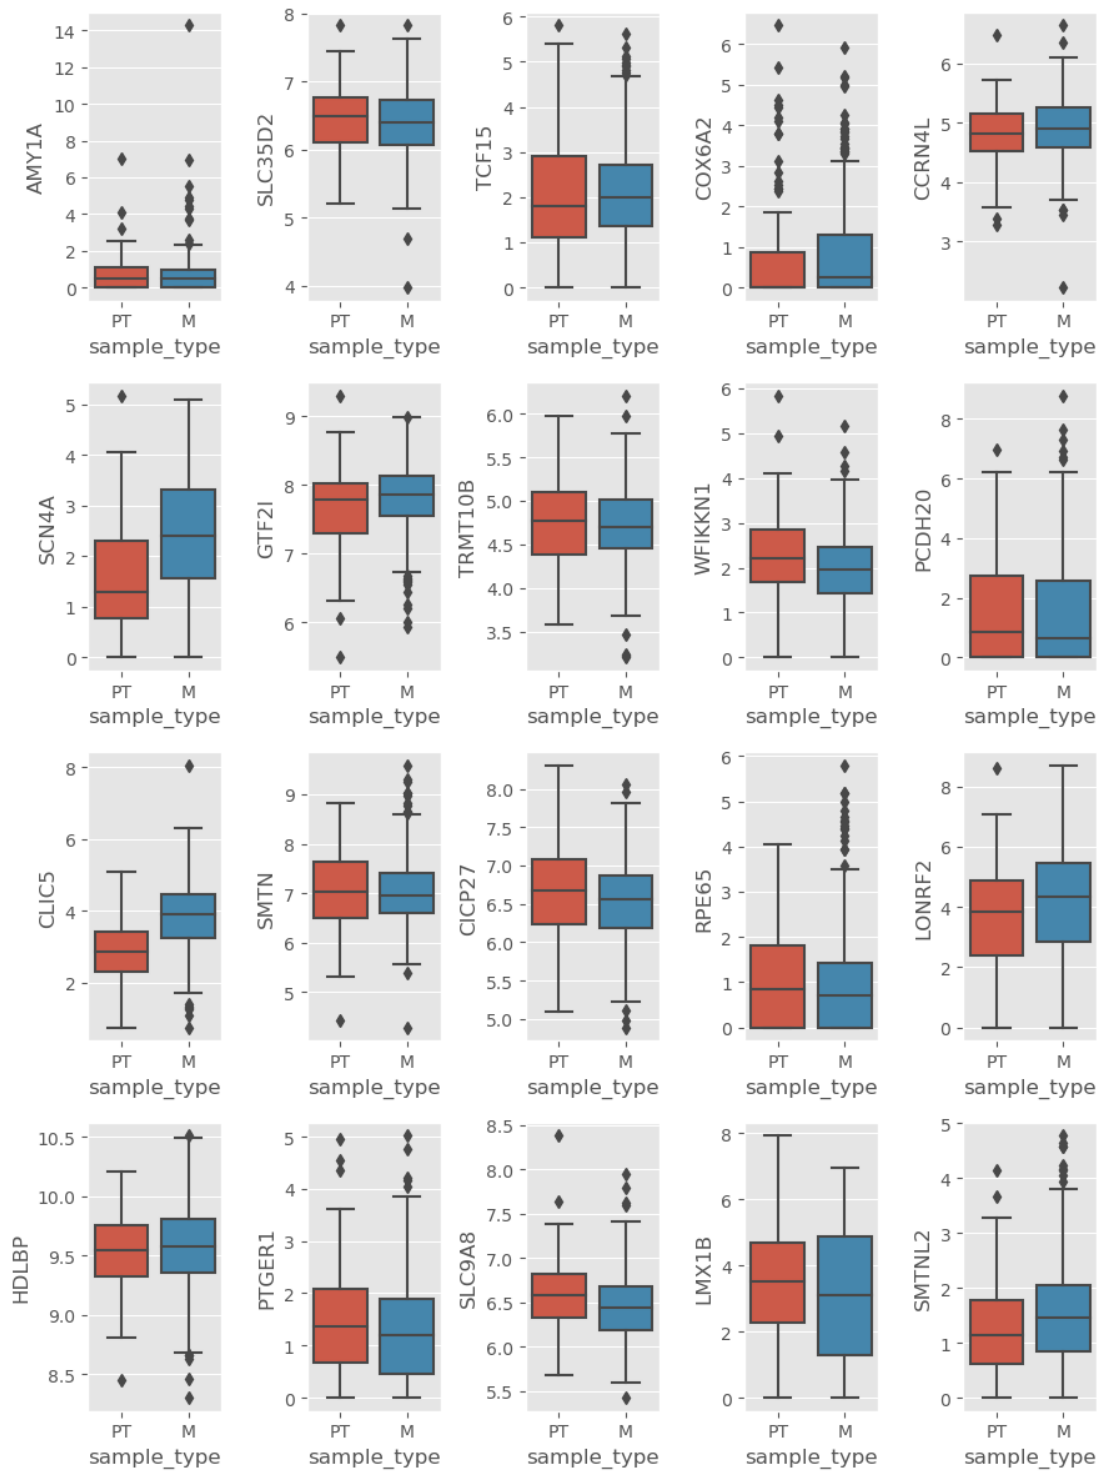

**Figure S 37.** Box Plots of Top 61 - 80 Gene Expressions.

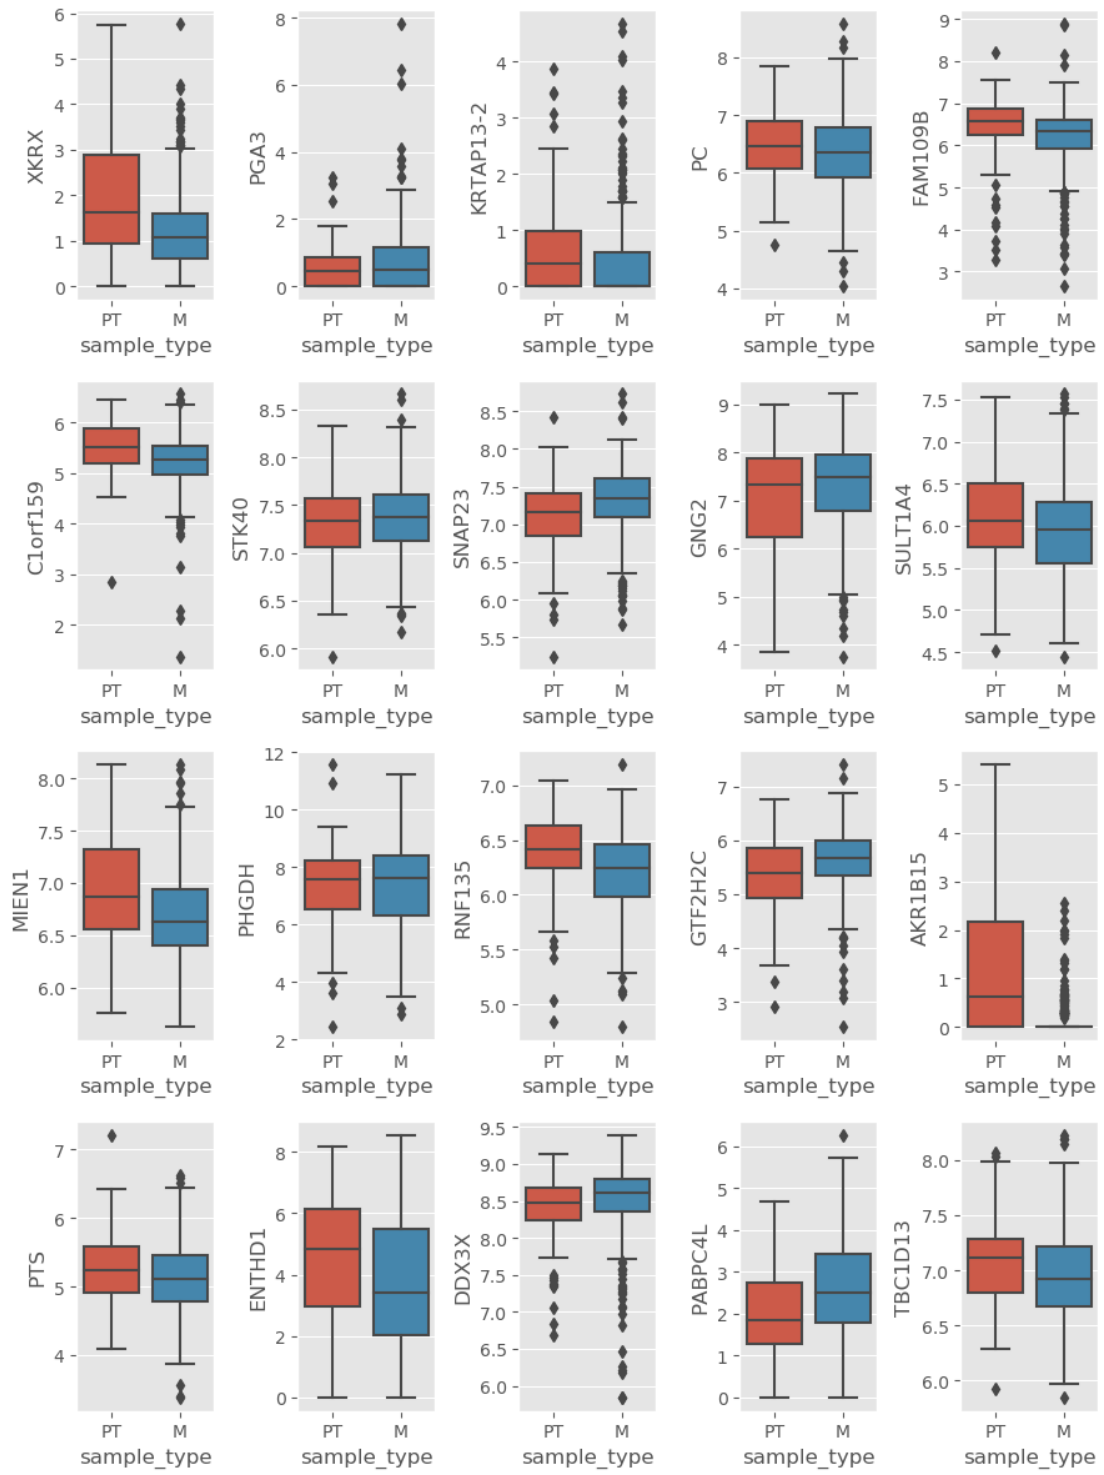

**Figure S 38.** Box Plots of Top 81 - 100 Gene Expressions.

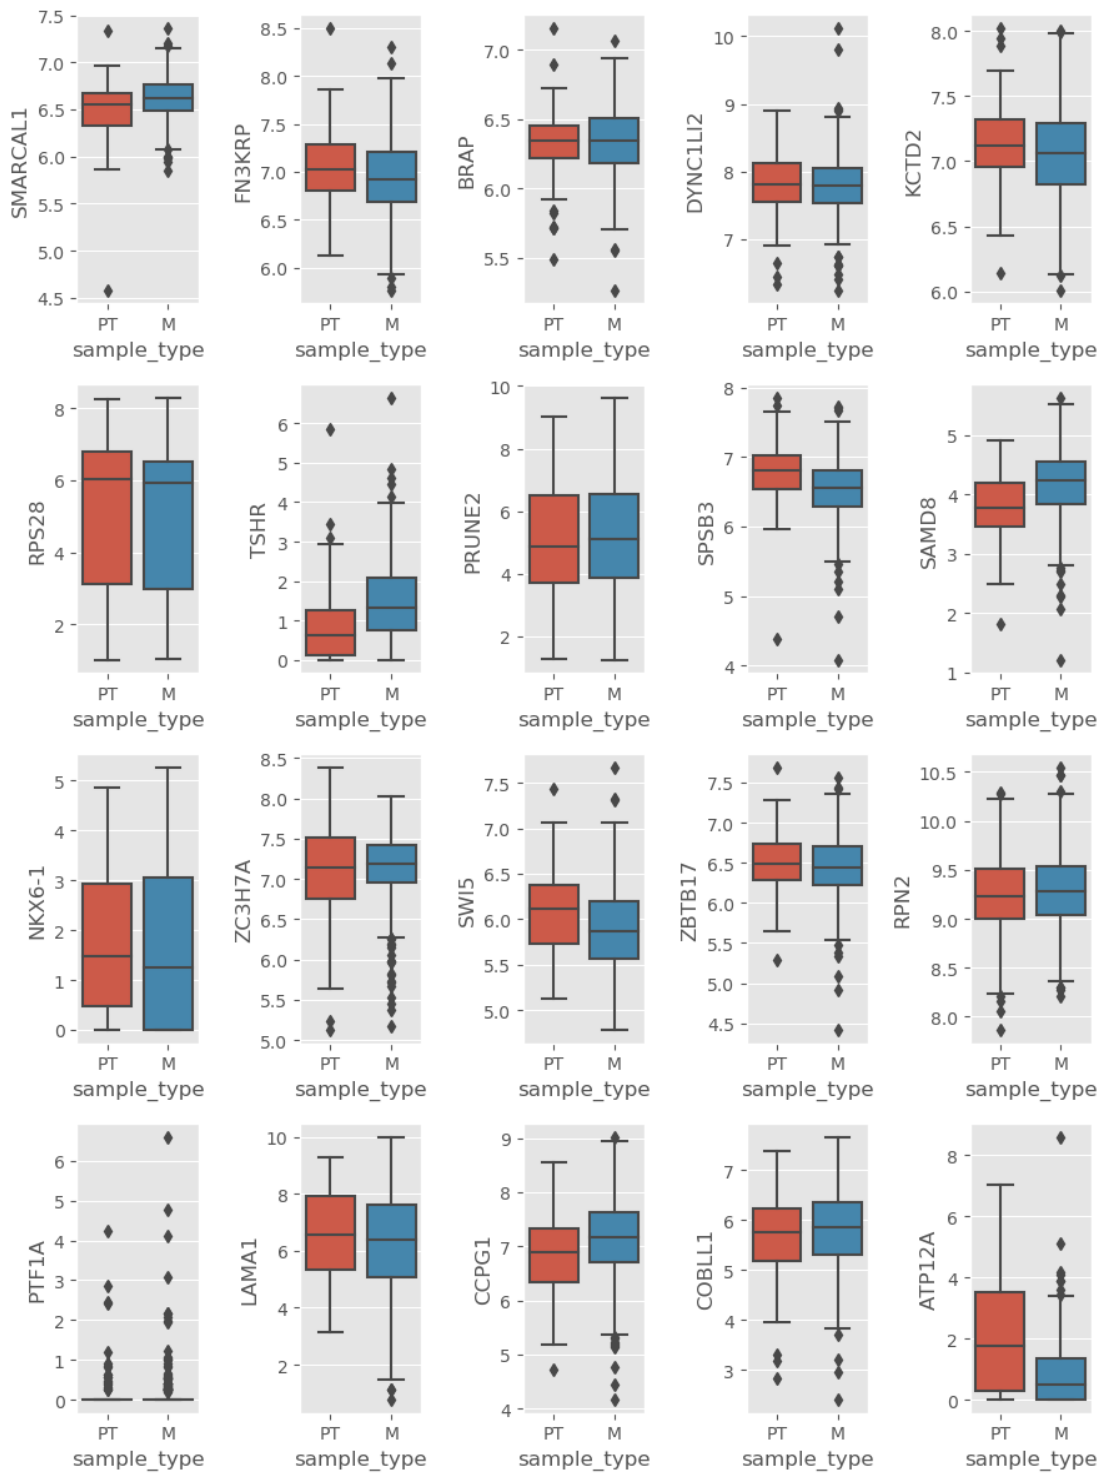

**Figure S 39.** Box Plots of Top 81 - 100 Gene Expressions.



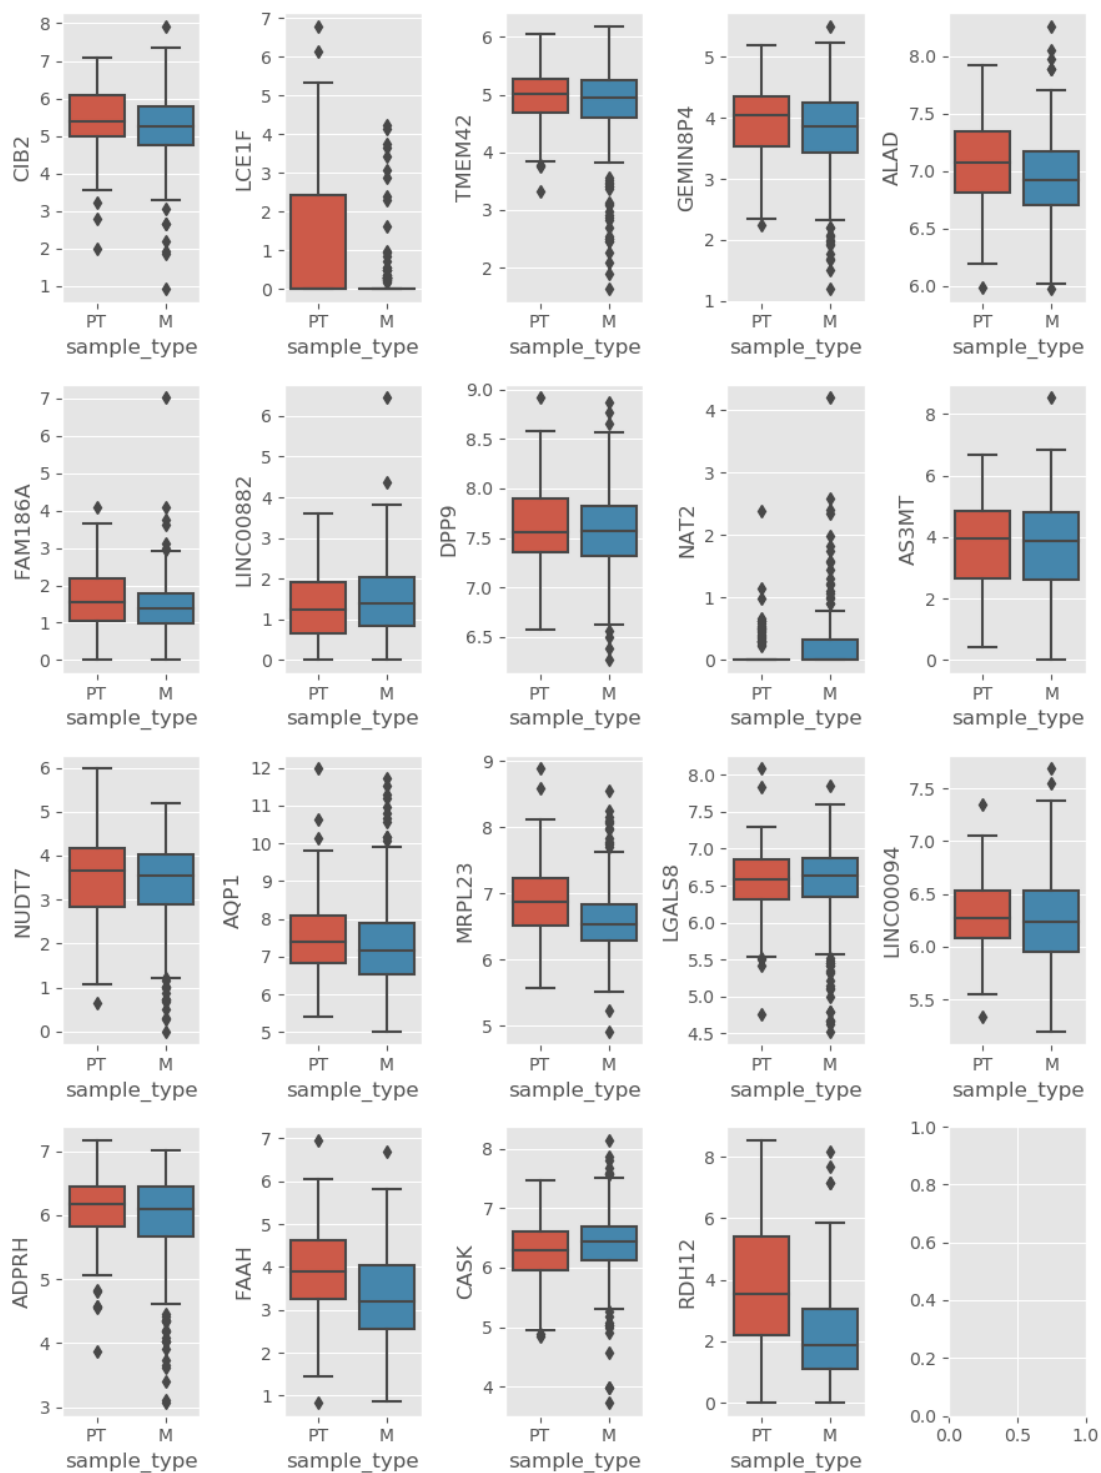

**Figure S 40.** Box Plots of Top 121 - 139 Gene Expressions.

| Model          | Average Expected Loss | Average Bias | Average Variance |
|----------------|-----------------------|--------------|------------------|
| RF-RF          | 0.0687                | 0.0569       | 0.0319           |
| RF-LR          | 0.0933                | 0.0894       | 0.0311           |
| RF-SVM-Sig     | 0.1202                | 0.1300       | 0.0275           |
| RF-PPI-NB      | 0.1241                | 0.1219       | 0.0257           |
| RF-NB          | 0.1378                | 0.1220       | 0.0704           |
| RF-SVM-L       | 0.1407                | 0.1382       | 0.0069           |
| RF-SVM-RB      | 0.1419                | 0.1382       | 0.0290           |
| RF-PPI-LR      | 0.1423                | 0.1463       | 0.0149           |
| RF-PPI-SVM-L   | 0.1463                | 0.1463       | 0.0295           |
| RF-PPI-SVM-Sig | 0.1951                | 0.2033       | 0.0100           |

**Table S 1.** Bias Variance Decomposition of the models

| Model Name                      | F1    | Accuracy | AUC    |
|---------------------------------|-------|----------|--------|
| Ensemble Model with Soft Voting | 90.60 | 91.05    | 0.9861 |

**Table S 2.** Model Performance (Validation Dataset) of Ensemble Model with Soft Voting
